# Supplementary material for: Plasmodium-infected erythrocytes induce secretion of IGFBP7 to form type II rosettes and escape phagocytosis
Source: eLife. 2020 Feb 18;9:e51546. doi: 10.7554/eLife.51546 (PMC7048393; doi:10.7554/eLife.51546)
Supplement: Supplementary file 2. [file elife-51546-supp2.xlsx]

## Sheet: Sheet1
Accession	Description	ΣCoverage	Σ# Proteins	Σ# Unique Peptides	Σ# Peptides	Σ# PSMs	Score A(3,6)	Coverage A(3,6)	# Peptides A(3,6)	# PSM A(3,6)	# AAs	MW [kDa]	calc. pI
F5H265	Polyubiquitin-C (Fragment) OS=Homo sapiens GN=UBC PE=1 SV=1 - [F5H265_HUMAN]	96.64	26	11	11	59	1098.08	96.64	13	59	149	16.8311	6.58057
P62328	Thymosin beta-4 OS=Homo sapiens GN=TMSB4X PE=1 SV=2 - [TYB4_HUMAN]	61.36	2	3	3	30	436.134	61.36	3	30	44	5.04952	5.05908
P68871	Hemoglobin subunit beta OS=Homo sapiens GN=HBB PE=1 SV=2 - [HBB_HUMAN]	59.18	4	2	7	32	540.223	59.18	8	32	147	15.9883	7.28369
H0YNU8	Tropomodulin-3 (Fragment) OS=Homo sapiens GN=TMOD3 PE=2 SV=1 - [H0YNU8_HUMAN]	57.58	2	1	1	1	18.41	57.58	1	1	33	3.92199	4.42432
P02768	Serum albumin OS=Homo sapiens GN=ALB PE=1 SV=2 - [ALBU_HUMAN]	48.28	7	34	34	629	17339.9	48.28	40	629	609	69.3215	6.27783
P02042	Hemoglobin subunit delta OS=Homo sapiens GN=HBD PE=1 SV=2 - [HBD_HUMAN]	46.26	5	1	6	17	218.097	46.26	6	17	147	16.0453	8.04541
K7EK43	Tubulin beta-6 chain (Fragment) OS=Homo sapiens GN=TUBB6 PE=4 SV=1 - [K7EK43_HUMAN]	45.16	1	1	1	5	112.603	45.16	1	5	31	3.41965	4.4624
A2T926	Thymopentin OS=Homo sapiens GN=TMPO PE=2 SV=1 - [A2T926_HUMAN]	42.74	6	6	6	18	581.05	42.74	6	18	248	27.3714	8.48486
P06727	Apolipoprotein A-IV OS=Homo sapiens GN=APOA4 PE=1 SV=3 - [APOA4_HUMAN]	41.67	1	14	14	39	857.136	41.67	14	39	396	45.3715	5.37646
P01834	Ig kappa chain C region OS=Homo sapiens GN=IGKC PE=1 SV=1 - [IGKC_HUMAN]	40.57	1	4	4	8	270.8	40.57	4	8	106	11.6017	5.87158
P02766	Transthyretin OS=Homo sapiens GN=TTR PE=1 SV=1 - [TTHY_HUMAN]	39.46	1	3	3	6	109.6	39.46	3	6	147	15.877	5.75732
P07108	Acyl-CoA-binding protein OS=Homo sapiens GN=DBI PE=1 SV=2 - [ACBP_HUMAN]	39.08	5	4	4	10	131.305	39.08	4	10	87	10.038	6.56592
F8WBS8	26S proteasome non-ATPase regulatory subunit 2 OS=Homo sapiens GN=PSMD2 PE=2 SV=1 - [F8WBS8_HUMAN]	38.98	3	1	1	1	74.3	38.98	1	1	59	6.57933	9.40771
E9PHK0	Tetranectin OS=Homo sapiens GN=CLEC3B PE=2 SV=1 - [E9PHK0_HUMAN]	38.13	2	4	4	11	208.45	38.13	4	11	160	17.7827	5.04639
P02787	Serotransferrin OS=Homo sapiens GN=TF PE=1 SV=3 - [TRFE_HUMAN]	37.97	7	30	30	82	1711.72	37.97	30	82	698	77.0136	7.12256
E5RJY1	Protein NDRG1 OS=Homo sapiens GN=NDRG1 PE=2 SV=1 - [E5RJY1_HUMAN]	37.86	6	2	2	3	147.083	37.86	2	3	103	10.9721	8.98291
P01040	Cystatin-A OS=Homo sapiens GN=CSTA PE=1 SV=1 - [CYTA_HUMAN]	37.76	2	3	3	3	67.64	37.76	3	3	98	10.9997	5.50342
F8WBR5	Calmodulin OS=Homo sapiens GN=CALM2 PE=2 SV=1 - [F8WBR5_HUMAN]	36.92	7	2	2	2	44.1	36.92	2	2	65	7.36744	4.00537
E9PPR1	Elongation factor 1-delta (Fragment) OS=Homo sapiens GN=EEF1D PE=2 SV=1 - [E9PPR1_HUMAN]	36.75	17	4	4	7	318.949	36.75	4	7	166	18.146	5.04639
P80723	Brain acid soluble protein 1 OS=Homo sapiens GN=BASP1 PE=1 SV=2 - [BASP1_HUMAN]	36.56	2	4	4	18	538.284	36.56	6	18	227	22.68	4.62744
P02763	Alpha-1-acid glycoprotein 1 OS=Homo sapiens GN=ORM1 PE=1 SV=1 - [A1AG1_HUMAN]	36.32	1	5	7	26	564.567	36.32	7	26	201	23.4968	5.021
E9PKI2	Nucleosome assembly protein 1-like 4 (Fragment) OS=Homo sapiens GN=NAP1L4 PE=2 SV=1 - [E9PKI2_HUMAN]	35.9	12	2	2	2	74.04	35.9	2	2	78	8.59641	8.20654
P02647	Apolipoprotein A-I OS=Homo sapiens GN=APOA1 PE=1 SV=1 - [APOA1_HUMAN]	35.21	2	10	10	39	516.074	35.21	10	39	267	30.7589	5.75732
P00441	Superoxide dismutase [Cu-Zn] OS=Homo sapiens GN=SOD1 PE=1 SV=2 - [SODC_HUMAN]	35.06	2	4	4	8	322.3	35.06	4	8	154	15.9259	6.12549
K7EK77	ATP synthase subunit alpha, mitochondrial (Fragment) OS=Homo sapiens GN=ATP5A1 PE=2 SV=1 - [K7EK77_HUMAN]	34.3	9	6	6	12	441.867	34.3	6	12	207	22.186	8.6167
P60709	Actin, cytoplasmic 1 OS=Homo sapiens GN=ACTB PE=1 SV=1 - [ACTB_HUMAN]	34.13	23	3	12	77	1797.69	34.13	15	77	375	41.7097	5.47803
O95786	Probable ATP-dependent RNA helicase DDX58 OS=Homo sapiens GN=DDX58 PE=1 SV=2 - [DDX58_HUMAN]	33.3	5	38	38	85	1101.48	33.3	39	85	925	106.531	6.40479
P35908	Keratin, type II cytoskeletal 2 epidermal OS=Homo sapiens GN=KRT2 PE=1 SV=2 - [K22E_HUMAN]	33.02	22	12	17	36	870.577	33.02	20	36	639	65.3932	8.00146
P04264	Keratin, type II cytoskeletal 1 OS=Homo sapiens GN=KRT1 PE=1 SV=6 - [K2C1_HUMAN]	32.61	2	16	20	54	1503.65	32.61	22	54	644	65.999	8.11865
D6R9D3	Heterogeneous nuclear ribonucleoprotein H OS=Homo sapiens GN=HNRNPH1 PE=2 SV=1 - [D6R9D3_HUMAN]	32.5	18	1	1	1	44.14	32.5	1	1	40	4.3471	4.43701
P0CF74	Ig lambda-6 chain C region OS=Homo sapiens GN=IGLC6 PE=4 SV=1 - [LAC6_HUMAN]	32.08	5	1	2	4	42.88	32.08	2	4	106	11.2695	7.23975
P09382	Galectin-1 OS=Homo sapiens GN=LGALS1 PE=1 SV=2 - [LEG1_HUMAN]	31.85	1	4	4	18	327.558	31.85	4	18	135	14.7062	5.50342
P19652	Alpha-1-acid glycoprotein 2 OS=Homo sapiens GN=ORM2 PE=1 SV=2 - [A1AG2_HUMAN]	31.34	1	4	6	18	192.903	31.34	6	18	201	23.5876	5.10986
P13645	Keratin, type I cytoskeletal 10 OS=Homo sapiens GN=KRT10 PE=1 SV=6 - [K1C10_HUMAN]	31.16	23	13	17	36	875.06	31.16	19	36	584	58.7917	5.21143
Q7Z422-2	Isoform 2 of SUZ domain-containing protein 1 OS=Homo sapiens GN=SZRD1 - [SZRD1_HUMAN]	31.06	6	2	2	2	31.89	31.06	2	2	132	14.5959	11.2388
P16949	Stathmin OS=Homo sapiens GN=STMN1 PE=1 SV=3 - [STMN1_HUMAN]	30.87	6	5	5	18	293.443	30.87	6	18	149	17.292	5.97314
P00918	Carbonic anhydrase 2 OS=Homo sapiens GN=CA2 PE=1 SV=2 - [CAH2_HUMAN]	29.23	3	5	5	16	174.145	29.23	5	16	260	29.2279	7.40088
P62805	Histone H4 OS=Homo sapiens GN=HIST1H4A PE=1 SV=2 - [H4_HUMAN]	29.13	1	3	3	10	273.2	29.13	4	10	103	11.3604	11.356
H0YC10	Polyadenylate-binding protein 1 (Fragment) OS=Homo sapiens GN=PABPC1 PE=4 SV=1 - [H0YC10_HUMAN]	28.57	1	1	1	2	35.84	28.57	1	2	42	4.36922	5.8335
F5H2R5	Rho GDP-dissociation inhibitor 2 (Fragment) OS=Homo sapiens GN=ARHGDIB PE=2 SV=1 - [F5H2R5_HUMAN]	28.41	5	3	3	3	65.75	28.41	3	3	88	9.78591	4.58936
P69905	Hemoglobin subunit alpha OS=Homo sapiens GN=HBA1 PE=1 SV=2 - [HBA_HUMAN]	28.17	1	1	3	30	423.793	28.17	3	30	142	15.2479	8.67529
H0YLR3	U2 small nuclear ribonucleoprotein A' (Fragment) OS=Homo sapiens GN=SNRPA1 PE=2 SV=1 - [H0YLR3_HUMAN]	28.09	3	3	3	6	175.677	28.09	3	6	89	9.47188	8.47021
K7EJT5	60S ribosomal protein L22 (Fragment) OS=Homo sapiens GN=RPL22 PE=2 SV=1 - [K7EJT5_HUMAN]	27.66	7	1	1	2	85.34	27.66	1	2	47	5.07968	9.42236
P63267	Actin, gamma-enteric smooth muscle OS=Homo sapiens GN=ACTG2 PE=1 SV=1 - [ACTH_HUMAN]	27.39	17	1	10	73	1749.11	27.39	13	73	376	41.8498	5.47803
Q5VY30	Plasma retinol-binding protein(1-182) OS=Homo sapiens GN=RBP4 PE=3 SV=1 - [Q5VY30_HUMAN]	27.14	2	5	5	37	729.829	27.14	5	37	199	22.9291	6.0874
K7EJ44	Profilin 1, isoform CRA_b OS=Homo sapiens GN=PFN1 PE=2 SV=1 - [K7EJ44_HUMAN]	26.92	2	2	2	8	221.445	26.92	2	8	104	11.3828	9.17334
Q9UKY7-2	Isoform 2 of Protein CDV3 homolog OS=Homo sapiens GN=CDV3 - [CDV3_HUMAN]	26.76	2	2	2	4	81.55	26.76	2	4	213	22.0658	5.80811
F8WE65	Peptidyl-prolyl cis-trans isomerase OS=Homo sapiens GN=PPIA PE=2 SV=1 - [F8WE65_HUMAN]	26.67	5	3	3	9	256.805	26.67	3	9	120	13.0133	6.771
P30050	60S ribosomal protein L12 OS=Homo sapiens GN=RPL12 PE=1 SV=1 - [RL12_HUMAN]	26.67	2	3	3	5	225.78	26.67	3	5	165	17.8075	9.42236
Q09666	Neuroblast differentiation-associated protein AHNAK OS=Homo sapiens GN=AHNAK PE=1 SV=2 - [AHNK_HUMAN]	26.66	1	58	59	102	1482.68	26.66	59	102	5890	628.699	6.15088
E9PQD0	Probable RNA-binding protein EIF1AD OS=Homo sapiens GN=EIF1AD PE=2 SV=1 - [E9PQD0_HUMAN]	26.56	6	1	1	1	77.59	26.56	1	1	64	7.32701	10.5063
P02775	Platelet basic protein OS=Homo sapiens GN=PPBP PE=1 SV=3 - [CXCL7_HUMAN]	26.56	1	3	3	9	91.8471	26.56	3	9	128	13.8854	8.79248
P02810	Salivary acidic proline-rich phosphoprotein 1/2 OS=Homo sapiens GN=PRH1 PE=1 SV=2 - [PRPC_HUMAN]	26.51	1	1	1	5	37.88	26.51	1	5	166	17.0063	4.84326
P35527	Keratin, type I cytoskeletal 9 OS=Homo sapiens GN=KRT9 PE=1 SV=3 - [K1C9_HUMAN]	26.48	2	12	13	37	900.128	26.48	13	37	623	62.0268	5.23682
J3QQT9	60S ribosomal protein L23 (Fragment) OS=Homo sapiens GN=RPL23 PE=2 SV=1 - [J3QQT9_HUMAN]	26.47	5	2	2	2	41.1	26.47	2	2	34	3.98932	11.5171
F8VPP1	Adenylate kinase 2, mitochondrial OS=Homo sapiens GN=AK2 PE=2 SV=1 - [F8VPP1_HUMAN]	26.19	9	1	1	3	45.7433	26.19	1	3	42	4.45746	8.6167
D6RFH4	Cytochrome b5 type B OS=Homo sapiens GN=CYB5B PE=2 SV=1 - [D6RFH4_HUMAN]	25.95	4	1	1	2	75.2	25.95	1	2	131	14.8366	6.18896
C9JJE5	Isocitrate dehydrogenase [NADP] cytoplasmic (Fragment) OS=Homo sapiens GN=IDH1 PE=2 SV=1 - [C9JJE5_HUMAN]	25.81	4	1	1	1	44.02	25.81	1	1	62	7.06752	4.61475
E5RGC4	Polyadenylate-binding protein 1 (Fragment) OS=Homo sapiens GN=PABPC1 PE=2 SV=1 - [E5RGC4_HUMAN]	25.58	13	1	1	1	62.01	25.58	1	1	43	4.66626	4.89404
Q14061	Cytochrome c oxidase copper chaperone OS=Homo sapiens GN=COX17 PE=1 SV=2 - [COX17_HUMAN]	25.4	2	1	1	1	27.14	25.4	1	1	63	6.91038	7.23975
E9PR54	Cathepsin B heavy chain (Fragment) OS=Homo sapiens GN=CTSB PE=2 SV=1 - [E9PR54_HUMAN]	24.49	11	2	2	2	64.42	24.49	2	2	98	11.3676	8.49951
P05387	60S acidic ribosomal protein P2 OS=Homo sapiens GN=RPLP2 PE=1 SV=1 - [RLA2_HUMAN]	24.35	2	3	3	7	329.307	24.35	4	7	115	11.6578	4.53857
P00558	Phosphoglycerate kinase 1 OS=Homo sapiens GN=PGK1 PE=1 SV=3 - [PGK1_HUMAN]	23.98	4	8	8	15	324.15	23.98	8	15	417	44.5861	8.104
H0YEL5	Peptidyl-prolyl cis-trans isomerase H (Fragment) OS=Homo sapiens GN=PPIH PE=2 SV=1 - [H0YEL5_HUMAN]	23.96	4	3	3	4	75.4834	23.96	3	4	96	10.2741	8.19189
O00299	Chloride intracellular channel protein 1 OS=Homo sapiens GN=CLIC1 PE=1 SV=4 - [CLIC1_HUMAN]	23.65	1	3	3	4	142.43	23.65	3	4	241	26.9057	5.17334
Q8WW12-3	Isoform 3 of PEST proteolytic signal-containing nuclear protein OS=Homo sapiens GN=PCNP - [PCNP_HUMAN]	23.64	2	1	1	1	69.81	23.64	1	1	55	6.22903	9.70068
A6NGP5	Hematological and neurological-expressed 1-like protein OS=Homo sapiens GN=HN1L PE=2 SV=2 - [A6NGP5_HUMAN]	23.03	10	2	2	2	53.99	23.03	2	2	178	18.8944	9.45166
J3KMY5	Epididymal secretory protein E1 OS=Homo sapiens GN=NPC2 PE=2 SV=1 - [J3KMY5_HUMAN]	22.97	8	3	3	3	43.54	22.97	3	3	148	16.2193	7.6499
P04075	Fructose-bisphosphate aldolase A OS=Homo sapiens GN=ALDOA PE=1 SV=2 - [ALDOA_HUMAN]	22.8	10	7	7	13	387.333	22.8	8	13	364	39.3953	8.08936
G3V1N2	HCG1745306, isoform CRA_a OS=Homo sapiens GN=HBA2 PE=2 SV=1 - [G3V1N2_HUMAN]	22.73	1	1	3	45	599.338	22.73	3	45	110	11.9402	8.76318
F8WAM2	T-complex protein 1 subunit eta (Fragment) OS=Homo sapiens GN=CCT7 PE=2 SV=1 - [F8WAM2_HUMAN]	22.45	3	2	2	2	24.63	22.45	2	2	98	10.4878	7.41553
K7EJ51	Septin-9 (Fragment) OS=Homo sapiens GN=SEPT9 PE=2 SV=1 - [K7EJ51_HUMAN]	22.39	9	2	2	2	23.51	22.39	2	2	134	14.4595	7.41553
E5RK46	Transcription elongation factor A protein 1 OS=Homo sapiens GN=TCEA1 PE=2 SV=1 - [E5RK46_HUMAN]	22.22	6	1	1	1	28.28	22.22	1	1	45	5.22483	8.52881
Q567R9	CIP29 protein OS=Homo sapiens GN=CIP29 PE=2 SV=1 - [Q567R9_HUMAN]	22	4	3	3	3	54.2125	22	3	3	150	16.82	9.70068
H3BTN5	Pyruvate kinase (Fragment) OS=Homo sapiens GN=PKM PE=2 SV=1 - [H3BTN5_HUMAN]	21.86	14	10	10	24	559.105	21.86	10	24	485	53.0112	6.84424
D6RJE2	Alpha-adducin OS=Homo sapiens GN=ADD1 PE=2 SV=1 - [D6RJE2_HUMAN]	21.74	10	1	1	1	27.29	21.74	1	1	69	8.09999	7.25439
P22392-2	Isoform 3 of Nucleoside diphosphate kinase B OS=Homo sapiens GN=NME2 - [NDKB_HUMAN]	21.72	11	2	2	3	87.85	21.72	2	3	267	30.1176	8.92432
C9JTK6	Obg-like ATPase 1 (Fragment) OS=Homo sapiens GN=OLA1 PE=2 SV=1 - [C9JTK6_HUMAN]	21.55	4	3	3	3	97.53	21.55	3	3	116	12.2944	8.90967
G3V1A4	Cofilin 1 (Non-muscle), isoform CRA_a OS=Homo sapiens GN=CFL1 PE=4 SV=1 - [G3V1A4_HUMAN]	21.48	4	2	2	2	53.65	21.48	2	2	149	16.8008	8.35303
D6RF44	Heterogeneous nuclear ribonucleoprotein D0 (Fragment) OS=Homo sapiens GN=HNRNPD PE=2 SV=1 - [D6RF44_HUMAN]	21.43	14	1	2	4	126.65	21.43	2	4	112	12.6325	8.57275
F5H1V7	Tyrosine-protein phosphatase non-receptor type 6 OS=Homo sapiens GN=PTPN6 PE=2 SV=1 - [F5H1V7_HUMAN]	21.43	10	1	1	2	39.65	21.43	1	2	56	6.14317	11.6196
H0Y8D1	Trypsin-1 (Fragment) OS=Homo sapiens GN=PRSS1 PE=2 SV=1 - [H0Y8D1_HUMAN]	21.13	3	2	2	8	75.4074	21.13	2	8	142	15.4118	7.26904
C9JJ34	Ran-specific GTPase-activating protein (Fragment) OS=Homo sapiens GN=RANBP1 PE=2 SV=1 - [C9JJ34_HUMAN]	20.86	2	1	1	5	56.63	20.86	1	5	163	18.7502	5.21143
O43516	WAS/WASL-interacting protein family member 1 OS=Homo sapiens GN=WIPF1 PE=1 SV=3 - [WIPF1_HUMAN]	20.28	5	6	6	7	86.61	20.28	6	7	503	51.2274	11.4731
F8VPF3	Myosin light polypeptide 6 (Fragment) OS=Homo sapiens GN=MYL6 PE=2 SV=1 - [F8VPF3_HUMAN]	20	14	2	2	5	142.61	20	3	5	130	14.4268	4.51318
Q9Y333	U6 snRNA-associated Sm-like protein LSm2 OS=Homo sapiens GN=LSM2 PE=1 SV=1 - [LSM2_HUMAN]	20	1	1	1	2	201.82	20	1	2	95	10.8276	6.52197
D6RBX4	Transforming growth factor-beta-induced protein ig-h3 OS=Homo sapiens GN=TGFBI PE=2 SV=1 - [D6RBX4_HUMAN]	20	4	1	1	4	39.85	20	1	4	65	7.26784	9.979
H3BR37	Telomeric repeat-binding factor 2 (Fragment) OS=Homo sapiens GN=TERF2 PE=4 SV=2 - [H3BR37_HUMAN]	20	1	1	1	1	21.73	20	1	1	60	6.55529	8.23584
F8W0U6	Dynactin subunit 2 OS=Homo sapiens GN=DCTN2 PE=2 SV=1 - [F8W0U6_HUMAN]	20	8	1	1	1	31.23	20	1	1	45	5.08739	3.97998
K7ERZ3	Perilipin-3 (Fragment) OS=Homo sapiens GN=PLIN3 PE=4 SV=1 - [K7ERZ3_HUMAN]	19.86	6	4	4	7	198.013	19.86	4	7	292	31.9632	5.13525
P07919	Cytochrome b-c1 complex subunit 6, mitochondrial OS=Homo sapiens GN=UQCRH PE=1 SV=2 - [QCR6_HUMAN]	19.78	1	1	1	1	21.19	19.78	1	1	91	10.7319	4.43701
P30041	Peroxiredoxin-6 OS=Homo sapiens GN=PRDX6 PE=1 SV=3 - [PRDX6_HUMAN]	19.64	1	4	4	6	107.976	19.64	4	6	224	25.0192	6.37939
P16401	Histone H1.5 OS=Homo sapiens GN=HIST1H1B PE=1 SV=3 - [H15_HUMAN]	19.47	1	4	4	9	127.02	19.47	4	9	226	22.5665	10.9165
P22626	Heterogeneous nuclear ribonucleoproteins A2/B1 OS=Homo sapiens GN=HNRNPA2B1 PE=1 SV=2 - [ROA2_HUMAN]	19.26	12	5	6	9	148.319	19.26	6	9	353	37.4067	8.95361
E5RIF1	Ubiquitin-conjugating enzyme E2 variant 2 (Fragment) OS=Homo sapiens GN=UBE2V2 PE=4 SV=1 - [E5RIF1_HUMAN]	19.23	11	1	1	1	45.75	19.23	1	1	52	5.8779	4.50049
Q01518-2	Isoform 2 of Adenylyl cyclase-associated protein 1 OS=Homo sapiens GN=CAP1 - [CAP1_HUMAN]	19.2	17	9	9	29	574.691	19.2	9	29	474	51.7977	8.06006
P02656	Apolipoprotein C-III OS=Homo sapiens GN=APOC3 PE=1 SV=1 - [APOC3_HUMAN]	19.19	2	2	2	5	208.25	19.19	3	5	99	10.8455	5.41455
E9PGG1	Cytoplasmic dynein 1 intermediate chain 2 (Fragment) OS=Homo sapiens GN=DYNC1I2 PE=2 SV=1 - [E9PGG1_HUMAN]	19.09	18	1	1	1	70.71	19.09	1	1	110	12.3204	8.35303
H3BP42	Apoptosis-associated speck-like protein-containing a CARD (Fragment) OS=Homo sapiens GN=PYCARD PE=2 SV=1 - [H3BP42_HUMAN]	19.05	4	3	3	3	103.962	19.05	3	3	126	13.5831	8.47021
P02652	Apolipoprotein A-II OS=Homo sapiens GN=APOA2 PE=1 SV=1 - [APOA2_HUMAN]	19	1	3	3	12	109.309	19	3	12	100	11.1679	6.62451
P10124	Serglycin OS=Homo sapiens GN=SRGN PE=1 SV=3 - [SRGN_HUMAN]	18.99	1	3	3	28	685.122	18.99	4	28	158	17.6406	4.95752
P02774	Vitamin D-binding protein OS=Homo sapiens GN=GC PE=1 SV=1 - [VTDB_HUMAN]	18.78	6	6	6	33	526.07	18.78	7	33	474	52.929	5.5415
P39019	40S ribosomal protein S19 OS=Homo sapiens GN=RPS19 PE=1 SV=2 - [RS19_HUMAN]	18.62	5	3	3	9	140.546	18.62	3	9	145	16.0505	10.3159
P01034	Cystatin-C OS=Homo sapiens GN=CST3 PE=1 SV=1 - [CYTC_HUMAN]	18.49	1	2	2	6	236.49	18.49	2	6	146	15.7891	8.74854
H0YLF3	Beta-2-microglobulin form pI 5.3 (Fragment) OS=Homo sapiens GN=B2M PE=2 SV=1 - [H0YLF3_HUMAN]	18.31	3	2	2	8	131.667	18.31	3	8	71	8.49315	5.14795
P36222	Chitinase-3-like protein 1 OS=Homo sapiens GN=CHI3L1 PE=1 SV=2 - [CH3L1_HUMAN]	18.28	2	6	6	15	261.344	18.28	6	15	383	42.5984	8.45557
Q9NQP5	Coagulation factor XIII A chain (Fragment) OS=Homo sapiens GN=F13A1 PE=2 SV=2 - [Q9NQP5_HUMAN]	18.12	4	1	1	3	23.5	18.12	1	3	138	15.9412	9.26123
A2A2R6	Guanine nucleotide-binding protein G(s) subunit alpha isoforms short (Fragment) OS=Homo sapiens GN=GNAS PE=2 SV=1 - [A2A2R6_HUMAN]	18.03	24	1	1	2	66.06	18.03	1	2	61	7.02583	10.0815
C9JYP1	Protein FAM107B (Fragment) OS=Homo sapiens GN=FAM107B PE=2 SV=1 - [C9JYP1_HUMAN]	17.91	9	1	1	2	31.4	17.91	1	2	67	8.00826	9.46631
Q0VAC5	HP protein OS=Homo sapiens GN=HP PE=2 SV=1 - [Q0VAC5_HUMAN]	17.87	9	7	7	13	140.856	17.87	7	13	347	38.4273	6.7417
C9JFR7	Cytochrome c (Fragment) OS=Homo sapiens GN=CYCS PE=2 SV=1 - [C9JFR7_HUMAN]	17.82	2	2	2	4	39.27	17.82	2	4	101	11.326	9.65674
S4R456	40S ribosomal protein S15 (Fragment) OS=Homo sapiens GN=RPS15 PE=4 SV=1 - [S4R456_HUMAN]	17.65	6	1	1	1	55.01	17.65	1	1	68	8.02147	11.4731
Q16270-2	Isoform 2 of Insulin-like growth factor-binding protein 7 OS=Homo sapiens GN=IGFBP7 - [IBP7_HUMAN]	17.56	2	6	6	7	175.309	17.56	6	7	279	28.8413	8.11865
Q07955-3	Isoform ASF-3 of Serine/arginine-rich splicing factor 1 OS=Homo sapiens GN=SRSF1 - [SRSF1_HUMAN]	17.41	7	3	3	5	71.06	17.41	3	5	201	22.446	7.94287
D6RER7	FYN-binding protein (Fragment) OS=Homo sapiens GN=FYB PE=2 SV=1 - [D6RER7_HUMAN]	17.39	5	1	1	1	21.77	17.39	1	1	115	12.0012	10.1401
P62857	40S ribosomal protein S28 OS=Homo sapiens GN=RPS28 PE=1 SV=1 - [RS28_HUMAN]	17.39	1	1	1	1	57.76	17.39	1	1	69	7.8362	10.6968
J3KS60	Rho GDP-dissociation inhibitor 1 OS=Homo sapiens GN=ARHGDIA PE=2 SV=1 - [J3KS60_HUMAN]	17.39	7	1	1	1	31.12	17.39	1	1	92	9.93797	4.32275
E9PL09	40S ribosomal protein S3 OS=Homo sapiens GN=RPS3 PE=2 SV=1 - [E9PL09_HUMAN]	17.32	14	4	4	8	138.985	17.32	4	8	231	25.3547	9.70068
P53999	Activated RNA polymerase II transcriptional coactivator p15 OS=Homo sapiens GN=SUB1 PE=1 SV=3 - [TCP4_HUMAN]	17.32	1	2	2	2	43.47	17.32	2	2	127	14.3864	9.59814
F8WCJ1	Eukaryotic translation initiation factor 5A-2 OS=Homo sapiens GN=EIF5A2 PE=2 SV=1 - [F8WCJ1_HUMAN]	17.14	9	1	1	2	33.78	17.14	1	2	105	11.6799	9.14404
H7C0Y9	HCLS1-binding protein 3 (Fragment) OS=Homo sapiens GN=HS1BP3 PE=4 SV=1 - [H7C0Y9_HUMAN]	17.12	3	1	1	1	44.65	17.12	1	1	111	11.7961	5.85889
B0QZK9	Heterochromatin protein 1-binding protein 3 (Fragment) OS=Homo sapiens GN=HP1BP3 PE=2 SV=1 - [B0QZK9_HUMAN]	17.11	4	1	1	1	18.9	17.11	1	1	76	8.23219	4.84326
P62861	40S ribosomal protein S30 OS=Homo sapiens GN=FAU PE=1 SV=1 - [RS30_HUMAN]	16.95	2	1	1	3	37.6733	16.95	1	3	59	6.64382	12.147
P61956-2	Isoform 2 of Small ubiquitin-related modifier 2 OS=Homo sapiens GN=SUMO2 - [SUMO2_HUMAN]	16.9	8	1	1	1	72.15	16.9	1	1	71	8.106	5.41455
Q9UHV9	Prefoldin subunit 2 OS=Homo sapiens GN=PFDN2 PE=1 SV=1 - [PFD2_HUMAN]	16.88	1	2	2	2	54.32	16.88	2	2	154	16.6376	6.58057
B8ZZL8	10 kDa heat shock protein, mitochondrial OS=Homo sapiens GN=HSPE1 PE=2 SV=1 - [B8ZZL8_HUMAN]	16.83	4	2	2	5	135.19	16.83	2	5	101	10.6828	9.5835
P26447	Protein S100-A4 OS=Homo sapiens GN=S100A4 PE=1 SV=1 - [S10A4_HUMAN]	16.83	1	2	2	5	31.4733	16.83	2	5	101	11.7207	6.11279
M0R081	C-type lectin domain family 11 member A OS=Homo sapiens GN=CLEC11A PE=4 SV=1 - [M0R081_HUMAN]	16.72	1	1	4	10	303.55	16.72	4	10	317	33.5134	7.35693
P08238	Heat shock protein HSP 90-beta OS=Homo sapiens GN=HSP90AB1 PE=1 SV=4 - [HS90B_HUMAN]	16.71	9	2	12	38	1163.87	16.71	13	38	724	83.2121	5.03369
P01606	Ig kappa chain V-I region OU OS=Homo sapiens PE=1 SV=1 - [KV114_HUMAN]	16.67	10	1	2	2	110.23	16.67	2	2	108	11.7697	9.90576
P01619	Ig kappa chain V-III region B6 OS=Homo sapiens PE=1 SV=1 - [KV301_HUMAN]	16.67	1	1	1	4	101.87	16.67	1	4	108	11.6278	9.24658
P01765	Ig heavy chain V-III region TIL OS=Homo sapiens PE=1 SV=1 - [HV304_HUMAN]	16.52	4	1	1	2	142.41	16.52	1	2	115	12.3481	9.12939
Q92945	Far upstream element-binding protein 2 OS=Homo sapiens GN=KHSRP PE=1 SV=4 - [FUBP2_HUMAN]	16.46	4	8	8	15	633.246	16.46	8	15	711	73.07	7.29834
P01860	Ig gamma-3 chain C region OS=Homo sapiens GN=IGHG3 PE=1 SV=2 - [IGHG3_HUMAN]	16.45	1	2	4	6	181.397	16.45	4	6	377	41.2604	7.89893
P02790	Hemopexin OS=Homo sapiens GN=HPX PE=1 SV=2 - [HEMO_HUMAN]	16.45	10	7	7	13	201.11	16.45	7	13	462	51.6433	7.02002
P07900	Heat shock protein HSP 90-alpha OS=Homo sapiens GN=HSP90AA1 PE=1 SV=5 - [HS90A_HUMAN]	16.39	17	4	11	30	781.392	16.39	13	30	732	84.6067	5.021
P80748	Ig lambda chain V-III region LOI OS=Homo sapiens PE=1 SV=1 - [LV302_HUMAN]	16.22	1	1	1	1	27.85	16.22	1	1	111	11.9278	5.08447
P60983	Glia maturation factor beta OS=Homo sapiens GN=GMFB PE=1 SV=2 - [GMFB_HUMAN]	16.2	2	1	1	1	61.01	16.2	1	1	142	16.7025	5.2876
B4DJK0	Serine/arginine-rich-splicing factor 5 OS=Homo sapiens GN=SRSF5 PE=2 SV=1 - [B4DJK0_HUMAN]	16.13	10	2	2	2	68.07	16.13	2	2	124	14.4283	10.0815
P01777	Ig heavy chain V-III region TEI OS=Homo sapiens PE=1 SV=1 - [HV316_HUMAN]	15.97	2	1	1	2	74.2228	15.97	1	2	119	12.7944	8.49951
M0QZG7	U1 small nuclear ribonucleoprotein A (Fragment) OS=Homo sapiens GN=SNRPA PE=4 SV=1 - [M0QZG7_HUMAN]	15.76	3	1	1	2	39.82	15.76	1	2	184	20.1232	9.87646
P60468	Protein transport protein Sec61 subunit beta OS=Homo sapiens GN=SEC61B PE=1 SV=2 - [SC61B_HUMAN]	15.63	1	1	1	3	142.003	15.63	2	3	96	9.9681	11.561
O43399-2	Isoform 2 of Tumor protein D54 OS=Homo sapiens GN=TPD52L2 - [TPD54_HUMAN]	15.59	7	2	2	2	105.45	15.59	2	2	186	19.8891	5.47803
G3V279	Enhancer of rudimentary homolog OS=Homo sapiens GN=ERH PE=2 SV=1 - [G3V279_HUMAN]	15.49	2	1	1	1	24.07	15.49	1	1	71	8.19787	4.70361
M0QX27	Urokinase plasminogen activator surface receptor (Fragment) OS=Homo sapiens GN=PLAUR PE=4 SV=1 - [M0QX27_HUMAN]	15.38	9	1	1	2	41.49	15.38	2	2	78	8.90631	6.02393
P10412	Histone H1.4 OS=Homo sapiens GN=HIST1H1E PE=1 SV=2 - [H14_HUMAN]	15.07	2	2	4	7	124.495	15.07	4	7	219	21.852	11.0337
P17096	High mobility group protein HMG-I/HMG-Y OS=Homo sapiens GN=HMGA1 PE=1 SV=3 - [HMGA1_HUMAN]	14.95	3	2	2	7	311.853	14.95	2	7	107	11.6691	10.3159
P16402	Histone H1.3 OS=Homo sapiens GN=HIST1H1D PE=1 SV=2 - [H13_HUMAN]	14.93	2	2	4	6	79.7	14.93	4	6	221	22.3363	11.019
Q9BRP8-2	Isoform 2 of Partner of Y14 and mago OS=Homo sapiens GN=WIBG - [WIBG_HUMAN]	14.78	2	2	2	2	72.88	14.78	2	2	203	22.691	9.43701
P06733	Alpha-enolase OS=Homo sapiens GN=ENO1 PE=1 SV=2 - [ENOA_HUMAN]	14.75	17	4	4	17	632.657	14.75	4	17	434	47.1393	7.38623
P17096-2	Isoform HMG-Y of High mobility group protein HMG-I/HMG-Y OS=Homo sapiens GN=HMGA1 - [HMGA1_HUMAN]	14.58	1	1	1	2	54.12	14.58	1	2	96	10.6726	10.3159
P02533	Keratin, type I cytoskeletal 14 OS=Homo sapiens GN=KRT14 PE=1 SV=4 - [K1C14_HUMAN]	14.41	29	3	7	14	364.241	14.41	7	14	472	51.5294	5.16064
B7ZKW8	CapZ-interacting protein OS=Homo sapiens GN=RCSD1 PE=2 SV=1 - [B7ZKW8_HUMAN]	14.25	3	3	3	6	199.047	14.25	3	6	386	41.2363	5.26221
P02649	Apolipoprotein E OS=Homo sapiens GN=APOE PE=1 SV=1 - [APOE_HUMAN]	14.2	4	4	4	7	252.942	14.2	4	7	317	36.1318	5.73193
B0YJC4	Vimentin OS=Homo sapiens GN=VIM PE=2 SV=1 - [B0YJC4_HUMAN]	14.15	5	7	7	11	151.886	14.15	8	11	431	49.6231	5.24951
P00747	Plasminogen OS=Homo sapiens GN=PLG PE=1 SV=2 - [PLMN_HUMAN]	13.95	3	11	11	22	433.647	13.95	11	22	810	90.5102	7.23975
P13796	Plastin-2 OS=Homo sapiens GN=LCP1 PE=1 SV=6 - [PLSL_HUMAN]	13.88	10	9	9	13	224.859	13.88	9	13	627	70.2439	5.42725
E9PBW4	Hemoglobin subunit gamma-2 OS=Homo sapiens GN=HBG2 PE=2 SV=1 - [E9PBW4_HUMAN]	13.87	5	1	2	3	45.9433	13.87	2	3	137	15.3091	9.46631
P24534	Elongation factor 1-beta OS=Homo sapiens GN=EEF1B2 PE=1 SV=3 - [EF1B_HUMAN]	13.78	2	2	2	2	99.62	13.78	2	2	225	24.7483	4.66553
B4DSQ1	Microtubule-associated protein OS=Homo sapiens GN=MAP4 PE=2 SV=1 - [B4DSQ1_HUMAN]	13.65	13	2	2	2	120.11	13.65	2	2	249	26.1039	10.7407
Q71UI9-5	Isoform 5 of Histone H2A.V OS=Homo sapiens GN=H2AFV - [H2AV_HUMAN]	13.64	19	1	1	5	67.9479	13.64	1	5	66	6.88774	11.063
P01009	Alpha-1-antitrypsin OS=Homo sapiens GN=SERPINA1 PE=1 SV=3 - [A1AT_HUMAN]	13.64	2	4	4	12	179.81	13.64	4	12	418	46.707	5.59229
Q9Y240	C-type lectin domain family 11 member A OS=Homo sapiens GN=CLEC11A PE=1 SV=1 - [CLC11_HUMAN]	13.62	1	1	4	10	300.46	13.62	4	10	323	35.6725	5.16064
B4E351	Insulin-like growth factor-binding protein 4 OS=Homo sapiens GN=IGFBP4 PE=2 SV=1 - [B4E351_HUMAN]	13.29	2	2	2	2	47.9779	13.29	2	2	158	17.6235	7.15186
Q5H9A7	Metalloproteinase inhibitor 1 OS=Homo sapiens GN=TIMP1 PE=2 SV=1 - [Q5H9A7_HUMAN]	13.29	5	2	2	3	27.91	13.29	2	3	143	16.0468	8.07471
P60174-1	Isoform 2 of Triosephosphate isomerase OS=Homo sapiens GN=TPI1 - [TPIS_HUMAN]	13.25	3	3	3	7	235.274	13.25	3	7	249	26.6527	6.90283
C9J9W2	LIM and SH3 domain protein 1 (Fragment) OS=Homo sapiens GN=LASP1 PE=2 SV=1 - [C9J9W2_HUMAN]	13.25	4	2	2	3	72.88	13.25	2	3	166	18.9683	9.01221
F5H2D4	Protein phosphatase methylesterase 1 (Fragment) OS=Homo sapiens GN=PPME1 PE=2 SV=1 - [F5H2D4_HUMAN]	13.24	3	1	1	3	50.89	13.24	1	3	136	14.7495	8.23584
P07311	Acylphosphatase-1 OS=Homo sapiens GN=ACYP1 PE=1 SV=2 - [ACYP1_HUMAN]	13.13	2	1	1	1	30.62	13.13	1	1	99	11.2539	9.30518
P62854	40S ribosomal protein S26 OS=Homo sapiens GN=RPS26 PE=1 SV=3 - [RS26_HUMAN]	13.04	2	1	1	4	26.99	13.04	1	4	115	13.0071	11.0044
K7EQA4	Minor histocompatibility antigen HA-1 (Fragment) OS=Homo sapiens GN=HMHA1 PE=2 SV=1 - [K7EQA4_HUMAN]	12.94	5	1	1	1	33.21	12.94	1	1	170	17.4538	6.02393
K7EJF2	Uncharacterized protein (Fragment) OS=Homo sapiens PE=4 SV=1 - [K7EJF2_HUMAN]	12.7	1	1	1	1	0	12.7	1	1	63	6.88042	8.71924
K7EQA1	Programmed cell death protein 5 OS=Homo sapiens GN=PDCD5 PE=2 SV=1 - [K7EQA1_HUMAN]	12.64	2	1	1	1	60.42	12.64	1	1	87	9.99825	8.99756
P62277	40S ribosomal protein S13 OS=Homo sapiens GN=RPS13 PE=1 SV=2 - [RS13_HUMAN]	12.58	2	2	2	2	34.15	12.58	2	2	151	17.2117	10.5356
Q8TF09	Dynein light chain roadblock-type 2 OS=Homo sapiens GN=DYNLRB2 PE=1 SV=1 - [DLRB2_HUMAN]	12.5	5	1	1	1	52.41	12.5	1	1	96	10.8477	7.50342
Q6P163	APOC2 protein OS=Homo sapiens GN=APOC2 PE=2 SV=1 - [Q6P163_HUMAN]	12.5	3	1	1	5	66.78	12.5	1	5	72	8.14122	4.89404
Q9BRK5-6	Isoform 6 of 45 kDa calcium-binding protein OS=Homo sapiens GN=SDF4 - [CAB45_HUMAN]	12.36	6	4	4	4	65.5833	12.36	4	4	348	39.5828	5.10986
C9JE76	Probable ATP-dependent RNA helicase DHX58 (Fragment) OS=Homo sapiens GN=DHX58 PE=2 SV=1 - [C9JE76_HUMAN]	12.18	3	2	2	4	43.4485	12.18	2	4	156	17.7201	6.60986
P01042-2	Isoform LMW of Kininogen-1 OS=Homo sapiens GN=KNG1 - [KNG1_HUMAN]	12.18	3	4	4	19	293.2	12.18	4	19	427	47.8527	6.65381
P02545-3	Isoform ADelta10 of Prelamin-A/C OS=Homo sapiens GN=LMNA - [LMNA_HUMAN]	12.15	8	6	6	7	276.251	12.15	6	7	634	70.6181	8.39697
H0YD13	CD44 antigen OS=Homo sapiens GN=CD44 PE=2 SV=2 - [H0YD13_HUMAN]	12.14	27	2	2	7	172.653	12.14	2	7	206	22.6686	8.19189
E9PJD9	60S ribosomal protein L27a OS=Homo sapiens GN=RPL27A PE=2 SV=1 - [E9PJD9_HUMAN]	12.09	4	1	1	2	72.2824	12.09	1	2	91	10.1206	10.2134
C9J7D1	Ras-related protein Rab-7a OS=Homo sapiens GN=RAB7A PE=2 SV=1 - [C9J7D1_HUMAN]	12.09	7	1	1	1	38.26	12.09	1	1	91	10.2462	7.92822
O95445-2	Isoform 2 of Apolipoprotein M OS=Homo sapiens GN=APOM - [APOM_HUMAN]	12.07	3	2	2	3	64.767	12.07	2	3	116	13.0424	7.75244
P62942	Peptidyl-prolyl cis-trans isomerase FKBP1A OS=Homo sapiens GN=FKBP1A PE=1 SV=2 - [FKB1A_HUMAN]	12.04	1	1	1	1	49.4	12.04	1	1	108	11.9431	8.1626
P20160	Azurocidin OS=Homo sapiens GN=AZU1 PE=1 SV=3 - [CAP7_HUMAN]	11.95	1	3	3	3	58.7833	11.95	3	3	251	26.8687	9.49561
P11142-2	Isoform 2 of Heat shock cognate 71 kDa protein OS=Homo sapiens GN=HSPA8 - [HSP7C_HUMAN]	11.76	18	4	5	10	224.828	11.76	5	10	493	53.4844	5.85889
Q5T0H9	Gelsolin OS=Homo sapiens GN=GSN PE=2 SV=1 - [Q5T0H9_HUMAN]	11.75	1	1	4	8	176.753	11.75	4	8	485	52.3402	5.33838
G3V1T4	Nuclear pore complex protein Nup107 OS=Homo sapiens GN=NUP107 PE=4 SV=1 - [G3V1T4_HUMAN]	11.65	2	1	1	1	25.4	11.65	1	1	103	11.3408	11.3853
E7EVW7	Hematopoietic lineage cell-specific protein OS=Homo sapiens GN=HCLS1 PE=2 SV=1 - [E7EVW7_HUMAN]	11.58	3	4	4	4	101.22	11.58	4	4	449	49.6739	4.7417
F6Q0E3	F-actin-capping protein subunit beta (Fragment) OS=Homo sapiens GN=CAPZB PE=2 SV=1 - [F6Q0E3_HUMAN]	11.57	7	1	1	1	38.05	11.57	1	1	121	13.6438	5.33838
A8K8G0	Hepatoma-derived growth factor OS=Homo sapiens GN=HDGF PE=2 SV=1 - [A8K8G0_HUMAN]	11.54	4	2	2	2	67.45	11.54	2	2	208	22.95	4.55127
P13647	Keratin, type II cytoskeletal 5 OS=Homo sapiens GN=KRT5 PE=1 SV=3 - [K2C5_HUMAN]	11.53	28	4	7	10	163.1	11.53	7	10	590	62.34	7.73779
P07437	Tubulin beta chain OS=Homo sapiens GN=TUBB PE=1 SV=2 - [TBB5_HUMAN]	11.49	27	4	4	9	191.161	11.49	4	9	444	49.639	4.89404
F8VZ29	Ubiquitin-conjugating enzyme E2 N OS=Homo sapiens GN=UBE2N PE=2 SV=1 - [F8VZ29_HUMAN]	11.49	5	1	1	1	20.22	11.49	1	1	87	9.73792	7.88428
Q12962	Transcription initiation factor TFIID subunit 10 OS=Homo sapiens GN=TAF10 PE=1 SV=1 - [TAF10_HUMAN]	11.47	1	1	1	1	129.53	11.47	1	1	218	21.6979	6.56592
P06702	Protein S100-A9 OS=Homo sapiens GN=S100A9 PE=1 SV=1 - [S10A9_HUMAN]	11.4	1	1	1	1	30.57	11.4	1	1	114	13.2335	6.12549
C9JMX4	Insulin-like growth factor-binding protein 3 (Fragment) OS=Homo sapiens GN=IGFBP3 PE=2 SV=1 - [C9JMX4_HUMAN]	11.36	5	1	1	1	55.51	11.36	1	1	132	14.8913	8.646
P02750	Leucine-rich alpha-2-glycoprotein OS=Homo sapiens GN=LRG1 PE=1 SV=2 - [A2GL_HUMAN]	11.24	1	3	3	4	55.0567	11.24	3	4	347	38.1541	6.94678
M0QZN2	40S ribosomal protein S5 OS=Homo sapiens GN=RPS5 PE=4 SV=1 - [M0QZN2_HUMAN]	11.19	4	1	1	1	21.49	11.19	1	1	134	14.7537	8.48486
P02765	Alpha-2-HS-glycoprotein OS=Homo sapiens GN=AHSG PE=1 SV=1 - [FETUA_HUMAN]	11.17	2	4	4	30	1385.58	11.17	5	30	367	39.2997	5.71924
Q5VU61	Tropomyosin alpha-3 chain OS=Homo sapiens GN=TPM3 PE=2 SV=1 - [Q5VU61_HUMAN]	11.16	14	3	3	6	147.827	11.16	4	6	224	26.2653	4.84326
P25311	Zinc-alpha-2-glycoprotein OS=Homo sapiens GN=AZGP1 PE=1 SV=2 - [ZA2G_HUMAN]	11.07	4	4	4	5	107.43	11.07	4	5	298	34.2371	6.04932
P37802	Transgelin-2 OS=Homo sapiens GN=TAGLN2 PE=1 SV=3 - [TAGL2_HUMAN]	11.06	1	2	2	6	142.94	11.06	2	6	199	22.3772	8.25049
K7ESL0	Spermidine synthase (Fragment) OS=Homo sapiens GN=SRM PE=2 SV=1 - [K7ESL0_HUMAN]	10.92	2	1	1	1	40.08	10.92	1	1	119	12.9735	6.75635
Q96C19	EF-hand domain-containing protein D2 OS=Homo sapiens GN=EFHD2 PE=1 SV=1 - [EFHD2_HUMAN]	10.83	1	2	2	2	58.71	10.83	2	2	240	26.6805	5.19873
E7ERK6	Clusterin beta chain (Fragment) OS=Homo sapiens GN=CLU PE=2 SV=1 - [E7ERK6_HUMAN]	10.78	13	2	2	3	77.6433	10.78	2	3	204	23.6967	5.14795
B9A064	Immunoglobulin lambda-like polypeptide 5 OS=Homo sapiens GN=IGLL5 PE=2 SV=2 - [IGLL5_HUMAN]	10.75	2	1	2	3	81.1812	10.75	2	3	214	23.0486	8.83643
C9JXB8	60S ribosomal protein L24 OS=Homo sapiens GN=RPL24 PE=2 SV=1 - [C9JXB8_HUMAN]	10.74	3	1	1	1	79.16	10.74	1	1	121	14.3598	11.312
R4GMX5	Basigin (Fragment) OS=Homo sapiens GN=BSG PE=4 SV=1 - [R4GMX5_HUMAN]	10.71	6	1	1	1	47.3	10.71	1	1	84	9.32951	5.36377
H0YFC6	GTP-binding nuclear protein Ran (Fragment) OS=Homo sapiens GN=RAN PE=4 SV=1 - [H0YFC6_HUMAN]	10.68	4	1	1	2	59.72	10.68	1	2	103	11.6712	10.3306
O14979-3	Isoform 3 of Heterogeneous nuclear ribonucleoprotein D-like OS=Homo sapiens GN=HNRNPDL - [HNRDL_HUMAN]	10.66	7	1	2	3	85.2767	10.66	2	3	244	27.1746	8.646
P04259	Keratin, type II cytoskeletal 6B OS=Homo sapiens GN=KRT6B PE=1 SV=5 - [K2C6B_HUMAN]	10.64	27	1	6	9	168.16	10.64	6	9	564	60.0303	8.00146
K7EMN2	6-phosphogluconate dehydrogenase, decarboxylating (Fragment) OS=Homo sapiens GN=PGD PE=2 SV=1 - [K7EMN2_HUMAN]	10.63	6	1	1	1	53.34	10.63	1	1	160	17.282	8.44092
Q02818	Nucleobindin-1 OS=Homo sapiens GN=NUCB1 PE=1 SV=4 - [NUCB1_HUMAN]	10.63	3	4	4	7	192.875	10.63	4	7	461	53.8463	5.24951
P10153	Non-secretory ribonuclease OS=Homo sapiens GN=RNASE2 PE=1 SV=2 - [RNAS2_HUMAN]	10.56	1	3	3	7	150.594	10.56	3	7	161	18.3421	8.73389
P06396-2	Isoform 2 of Gelsolin OS=Homo sapiens GN=GSN - [GELS_HUMAN]	10.53	8	6	9	23	484.168	10.53	9	23	731	80.5905	5.84619
P67809	Nuclease-sensitive element-binding protein 1 OS=Homo sapiens GN=YBX1 PE=1 SV=3 - [YBOX1_HUMAN]	10.49	2	2	2	3	137.92	10.49	2	3	324	35.9027	9.87646
Q5T8U3	60S ribosomal protein L7a (Fragment) OS=Homo sapiens GN=RPL7A PE=2 SV=1 - [Q5T8U3_HUMAN]	10.47	2	2	2	4	67.26	10.47	2	4	191	21.5314	11.019
E9PLA6	Serpin H1 (Fragment) OS=Homo sapiens GN=SERPINH1 PE=2 SV=1 - [E9PLA6_HUMAN]	10.47	11	1	1	2	63.42	10.47	1	2	86	8.86773	5.23682
P18065	Insulin-like growth factor-binding protein 2 OS=Homo sapiens GN=IGFBP2 PE=1 SV=2 - [IBP2_HUMAN]	10.46	3	3	3	9	290.022	10.46	3	9	325	34.7912	7.50342
K7EPV9	Tropomyosin alpha-4 chain (Fragment) OS=Homo sapiens GN=TPM4 PE=2 SV=1 - [K7EPV9_HUMAN]	10.42	11	1	1	3	66.0363	10.42	1	3	96	11.2836	4.67822
R4GN08	Actin-related protein 2/3 complex subunit 4 (Fragment) OS=Homo sapiens GN=ARPC4 PE=4 SV=1 - [R4GN08_HUMAN]	10.39	6	1	1	1	31.73	10.39	1	1	77	9.39878	7.51807
R4GNC5	Stromal interaction molecule 2 (Fragment) OS=Homo sapiens GN=STIM2 PE=4 SV=1 - [R4GNC5_HUMAN]	10.34	8	1	1	1	0	10.34	1	1	87	10.4669	4.94482
H0YNE3	Proteasome activator complex subunit 1 OS=Homo sapiens GN=PSME1 PE=2 SV=1 - [H0YNE3_HUMAN]	10.3	4	2	2	2	67.08	10.3	2	2	233	26.8529	5.78271
P01857	Ig gamma-1 chain C region OS=Homo sapiens GN=IGHG1 PE=1 SV=1 - [IGHG1_HUMAN]	10.3	1	2	3	8	220.24	10.3	3	8	330	36.0832	8.19189
F5H836	Paxillin (Fragment) OS=Homo sapiens GN=PXN PE=2 SV=1 - [F5H836_HUMAN]	10.17	5	1	1	1	49.31	10.17	1	1	177	18.8362	4.84326
Q15365	Poly(rC)-binding protein 1 OS=Homo sapiens GN=PCBP1 PE=1 SV=2 - [PCBP1_HUMAN]	10.11	23	3	3	3	107.967	10.11	3	3	356	37.4739	7.09326
P32119	Peroxiredoxin-2 OS=Homo sapiens GN=PRDX2 PE=1 SV=5 - [PRDX2_HUMAN]	10.1	2	2	2	2	59.7	10.1	2	2	198	21.8782	5.97314
Q5JP01	Histone-binding protein RBBP7 (Fragment) OS=Homo sapiens GN=RBBP7 PE=2 SV=1 - [Q5JP01_HUMAN]	9.82	4	2	2	3	71.76	9.82	2	3	285	31.4834	6.18896
H0YNP5	Annexin (Fragment) OS=Homo sapiens GN=ANXA2 PE=2 SV=1 - [H0YNP5_HUMAN]	9.71	23	2	2	2	52.866	9.71	2	2	175	19.715	5.21143
P62906	60S ribosomal protein L10a OS=Homo sapiens GN=RPL10A PE=1 SV=2 - [RL10A_HUMAN]	9.68	1	2	2	2	31.38	9.68	2	2	217	24.8155	9.93506
M0QYC4	Zinc finger protein 429 (Fragment) OS=Homo sapiens GN=ZNF429 PE=4 SV=1 - [M0QYC4_HUMAN]	9.68	1	1	1	1	37.34	9.68	1	1	93	9.76392	5.14795
B0AZP7	Chromaffin granule amine transporter OS=Homo sapiens GN=VAT1 PE=2 SV=1 - [B0AZP7_HUMAN]	9.65	7	2	2	7	189.73	9.65	2	7	259	28.3225	6.72705
P62753	40S ribosomal protein S6 OS=Homo sapiens GN=RPS6 PE=1 SV=1 - [RS6_HUMAN]	9.64	3	2	2	8	115.95	9.64	2	8	249	28.663	10.8433
E9PIT3	Thrombin light chain OS=Homo sapiens GN=F2 PE=2 SV=1 - [E9PIT3_HUMAN]	9.61	3	4	4	11	362.958	9.61	4	11	583	65.3667	5.70654
C9JMA6	Cysteine synthase (Fragment) OS=Homo sapiens GN=CBS PE=2 SV=1 - [C9JMA6_HUMAN]	9.6	3	1	1	1	58.17	9.6	1	1	177	19.0748	8.74854
P14174	Macrophage migration inhibitory factor OS=Homo sapiens GN=MIF PE=1 SV=4 - [MIF_HUMAN]	9.57	1	1	1	8	140.22	9.57	1	8	115	12.4682	7.88428
Q5T7C4	High mobility group protein B1 OS=Homo sapiens GN=HMGB1 PE=2 SV=1 - [Q5T7C4_HUMAN]	9.49	4	2	2	4	119.15	9.49	2	4	158	18.2993	9.70068
E9PQW1	Caspase recruitment domain-containing protein 16 (Fragment) OS=Homo sapiens GN=CARD16 PE=2 SV=1 - [E9PQW1_HUMAN]	9.47	8	1	1	1	24.8	9.47	1	1	95	10.3241	4.4751
Q9NZZ3-2	Isoform 2 of Charged multivesicular body protein 5 OS=Homo sapiens GN=CHMP5 - [CHMP5_HUMAN]	9.36	2	1	1	1	76.78	9.36	1	1	171	19.5079	6.84424
P01008	Antithrombin-III OS=Homo sapiens GN=SERPINC1 PE=1 SV=1 - [ANT3_HUMAN]	9.27	1	6	6	22	409.003	9.27	6	22	464	52.5689	6.7124
E9PKZ0	60S ribosomal protein L8 (Fragment) OS=Homo sapiens GN=RPL8 PE=2 SV=1 - [E9PKZ0_HUMAN]	9.27	5	2	2	4	94.06	9.27	2	4	205	22.3752	10.7554
P23284	Peptidyl-prolyl cis-trans isomerase B OS=Homo sapiens GN=PPIB PE=1 SV=2 - [PPIB_HUMAN]	9.26	1	2	2	3	68.5633	9.26	2	3	216	23.7275	9.40771
H0YM70	Proteasome activator complex subunit 2 OS=Homo sapiens GN=PSME2 PE=2 SV=1 - [H0YM70_HUMAN]	9.21	2	2	2	2	43.51	9.21	2	2	228	25.9946	5.92236
P04085-2	Isoform Short of Platelet-derived growth factor subunit A OS=Homo sapiens GN=PDGFA - [PDGFA_HUMAN]	9.18	3	1	1	1	74.1	9.18	1	1	196	22.2386	8.33838
H0YNJ9	Deoxyuridine 5'-triphosphate nucleotidohydrolase, mitochondrial OS=Homo sapiens GN=DUT PE=2 SV=1 - [H0YNJ9_HUMAN]	9.09	2	1	1	2	57.88	9.09	2	2	143	15.5379	7.89893
Q16629-3	Isoform 3 of Serine/arginine-rich splicing factor 7 OS=Homo sapiens GN=SRSF7 - [SRSF7_HUMAN]	9.09	5	1	1	1	22.09	9.09	1	1	132	15.2475	9.62744
H3BSN4	Transforming growth factor beta-1-induced transcript 1 protein (Fragment) OS=Homo sapiens GN=TGFB1I1 PE=2 SV=1 - [H3BSN4_HUMAN]	9.09	4	1	1	2	56.92	9.09	1	2	165	17.2955	6.31592
Q9C005	Protein dpy-30 homolog OS=Homo sapiens GN=DPY30 PE=1 SV=1 - [DPY30_HUMAN]	9.09	2	1	1	1	57.61	9.09	1	1	99	11.2428	4.88135
M0R1A1	Syntaxin-binding protein 2 (Fragment) OS=Homo sapiens GN=STXBP2 PE=4 SV=1 - [M0R1A1_HUMAN]	9.09	4	1	1	1	61.22	9.09	1	1	220	24.6007	7.1665
P00338	L-lactate dehydrogenase A chain OS=Homo sapiens GN=LDHA PE=1 SV=2 - [LDHA_HUMAN]	9.04	15	3	3	3	78.9267	9.04	3	3	332	36.6654	8.26514
B4DQ68	Calcineurin-like phosphoesterase domain-containing protein 1 OS=Homo sapiens GN=CPPED1 PE=2 SV=1 - [B4DQ68_HUMAN]	9.02	3	1	1	1	70.61	9.02	1	1	122	13.4537	8.33838
B4DUR8	T-complex protein 1 subunit gamma OS=Homo sapiens GN=CCT3 PE=2 SV=1 - [B4DUR8_HUMAN]	9	6	4	4	6	145.905	9	5	6	500	55.6387	5.64307
P01621	Ig kappa chain V-III region NG9 (Fragment) OS=Homo sapiens PE=1 SV=1 - [KV303_HUMAN]	9	1	1	1	1	0	9	1	1	100	10.7223	6.52197
E9PFZ2	Ceruloplasmin OS=Homo sapiens GN=CP PE=2 SV=1 - [E9PFZ2_HUMAN]	8.99	4	5	5	10	322.51	8.99	5	10	946	108.751	5.77002
P02776	Platelet factor 4 OS=Homo sapiens GN=PF4 PE=1 SV=2 - [PLF4_HUMAN]	8.91	2	1	1	2	36.93	8.91	1	2	101	10.8379	8.6167
H0Y6E7	RNA-binding motif protein, X chromosome, N-terminally processed (Fragment) OS=Homo sapiens GN=RBMX PE=4 SV=2 - [H0Y6E7_HUMAN]	8.9	8	2	2	2	75.55	8.9	2	2	292	31.8364	9.84717
E9PLD0	Ras-related protein Rab-1B OS=Homo sapiens GN=RAB1B PE=2 SV=1 - [E9PLD0_HUMAN]	8.88	2	1	1	1	53.16	8.88	1	1	169	18.4714	5.71924
E5RIX8	Tubulin-specific chaperone A OS=Homo sapiens GN=TBCA PE=2 SV=1 - [E5RIX8_HUMAN]	8.86	5	1	1	1	50.26	8.86	1	1	79	9.39093	5.37646
O43175	D-3-phosphoglycerate dehydrogenase OS=Homo sapiens GN=PHGDH PE=1 SV=4 - [SERA_HUMAN]	8.82	2	4	4	5	158.53	8.82	4	5	533	56.6144	6.7124
P02760	Protein AMBP OS=Homo sapiens GN=AMBP PE=1 SV=1 - [AMBP_HUMAN]	8.81	2	2	2	4	133.49	8.81	2	4	352	38.974	6.25244
P50990	T-complex protein 1 subunit theta OS=Homo sapiens GN=CCT8 PE=1 SV=4 - [TCPQ_HUMAN]	8.76	4	4	4	5	35.2267	8.76	4	5	548	59.5825	5.60498
K7EN27	Protein DJ-1 (Fragment) OS=Homo sapiens GN=PARK7 PE=2 SV=1 - [K7EN27_HUMAN]	8.75	3	1	1	1	20.91	8.75	1	1	160	16.9917	6.17627
J3QLU7	IST1 homolog OS=Homo sapiens GN=IST1 PE=2 SV=1 - [J3QLU7_HUMAN]	8.72	5	1	1	1	16.83	8.72	1	1	218	23.0744	4.67822
P00746	Complement factor D OS=Homo sapiens GN=CFD PE=1 SV=5 - [CFAD_HUMAN]	8.7	2	1	1	1	59.5	8.7	1	1	253	27.0159	7.7085
Q02878	60S ribosomal protein L6 OS=Homo sapiens GN=RPL6 PE=1 SV=3 - [RL6_HUMAN]	8.68	5	3	3	6	99.96	8.68	3	6	288	32.7076	10.5796
Q5T6W5	Heterogeneous nuclear ribonucleoprotein K OS=Homo sapiens GN=HNRNPK PE=4 SV=1 - [Q5T6W5_HUMAN]	8.64	7	3	3	18	352.365	8.64	3	18	428	47.5276	5.63037
P30044-2	Isoform Cytoplasmic+peroxisomal of Peroxiredoxin-5, mitochondrial OS=Homo sapiens GN=PRDX5 - [PRDX5_HUMAN]	8.64	2	1	1	1	25.82	8.64	1	1	162	17.02	7.23975
P62263	40S ribosomal protein S14 OS=Homo sapiens GN=RPS14 PE=1 SV=3 - [RS14_HUMAN]	8.61	1	1	1	4	191.297	8.61	1	4	151	16.2625	10.0522
Q5T1J5	Putative coiled-coil-helix-coiled-coil-helix domain-containing protein CHCHD2P9, mitochondrial OS=Homo sapiens GN=CHCHD2P9 PE=5 SV=1 - [CHCH9_HUMAN]	8.61	2	1	1	1	32.21	8.61	1	1	151	15.4797	9.89111
F8WE04	Heat shock protein beta-1 OS=Homo sapiens GN=HSPB1 PE=2 SV=1 - [F8WE04_HUMAN]	8.6	2	1	1	3	21.4767	8.6	1	3	186	20.3935	9.05615
B4DMM2	Polymerase delta-interacting protein 3 OS=Homo sapiens GN=POLDIP3 PE=2 SV=1 - [B4DMM2_HUMAN]	8.6	3	1	1	1	55.06	8.6	1	1	186	20.2114	8.27979
P51884	Lumican OS=Homo sapiens GN=LUM PE=1 SV=2 - [LUM_HUMAN]	8.58	1	3	3	9	183.066	8.58	3	9	338	38.4048	6.60986
D6R9P3	Heterogeneous nuclear ribonucleoprotein A/B OS=Homo sapiens GN=HNRNPAB PE=2 SV=1 - [D6R9P3_HUMAN]	8.57	9	1	2	3	95.22	8.57	2	3	280	30.284	7.91357
E9PES6	High mobility group protein B3 (Fragment) OS=Homo sapiens GN=HMGB3 PE=2 SV=1 - [E9PES6_HUMAN]	8.5	4	1	1	3	94.4133	8.5	1	3	153	17.511	9.78857
M0R019	Heterogeneous nuclear ribonucleoprotein M (Fragment) OS=Homo sapiens GN=HNRNPM PE=4 SV=1 - [M0R019_HUMAN]	8.5	7	2	2	3	86.928	8.5	2	3	353	37.6601	9.02686
P83881	60S ribosomal protein L36a OS=Homo sapiens GN=RPL36A PE=1 SV=2 - [RL36A_HUMAN]	8.49	5	1	1	2	46.67	8.49	1	2	106	12.4328	10.5796
P17987	T-complex protein 1 subunit alpha OS=Homo sapiens GN=TCP1 PE=1 SV=1 - [TCPA_HUMAN]	8.45	10	4	4	4	82.8333	8.45	4	4	556	60.3056	6.11279
P14543-2	Isoform 2 of Nidogen-1 OS=Homo sapiens GN=NID1 - [NID1_HUMAN]	8.35	2	8	8	17	312.176	8.35	8	17	1114	121.941	5.46533
H0Y2Y8	Zyxin (Fragment) OS=Homo sapiens GN=ZYX PE=2 SV=1 - [H0Y2Y8_HUMAN]	8.33	6	3	3	14	262.607	8.33	4	14	540	57.6063	6.87354
E7EUG6	General transcription factor IIF subunit 1 OS=Homo sapiens GN=GTF2F1 PE=2 SV=1 - [E7EUG6_HUMAN]	8.33	3	2	2	3	131.56	8.33	2	3	432	48.4533	7.44482
P01620	Ig kappa chain V-III region SIE OS=Homo sapiens PE=1 SV=1 - [KV302_HUMAN]	8.26	4	1	1	1	46.63	8.26	1	1	109	11.7678	8.48486
P68104	Elongation factor 1-alpha 1 OS=Homo sapiens GN=EEF1A1 PE=1 SV=1 - [EF1A1_HUMAN]	8.23	5	4	4	9	200.579	8.23	4	9	462	50.1091	9.01221
D6RD47	40S ribosomal protein S23 OS=Homo sapiens GN=RPS23 PE=2 SV=1 - [D6RD47_HUMAN]	8.21	2	1	1	1	35.25	8.21	1	1	134	14.8279	10.228
B7Z8Q5	Hyaluronan-binding protein 2 50 kDa heavy chain OS=Homo sapiens GN=HABP2 PE=2 SV=1 - [B7Z8Q5_HUMAN]	8.21	3	2	2	2	18.08	8.21	2	2	280	31.6521	5.73193
P26038	Moesin OS=Homo sapiens GN=MSN PE=1 SV=3 - [MOES_HUMAN]	8.15	4	3	5	6	99.01	8.15	5	6	577	67.7778	6.40479
H0Y9Y1	Butyrophilin subfamily 3 member A3 (Fragment) OS=Homo sapiens GN=BTF3 PE=2 SV=2 - [H0Y9Y1_HUMAN]	8.14	4	1	1	1	31.13	8.14	1	1	86	9.49375	4.99561
A2A2M0	Regulation of nuclear pre-mRNA domain-containing protein 1B (Fragment) OS=Homo sapiens GN=RPRD1B PE=2 SV=1 - [A2A2M0_HUMAN]	8.12	2	1	1	1	44.23	8.12	1	1	197	22.1144	4.93213
F5H4D6	Ras GTPase-activating protein-binding protein 1 OS=Homo sapiens GN=G3BP1 PE=2 SV=1 - [F5H4D6_HUMAN]	8.1	2	1	1	2	17.57	8.1	1	2	284	31.4321	5.97314
B7Z8B3	Peroxisomal biogenesis factor 19 OS=Homo sapiens GN=PEX19 PE=2 SV=1 - [B7Z8B3_HUMAN]	8.06	2	1	1	1	26.22	8.06	1	1	186	20.1087	5.13525
P12004	Proliferating cell nuclear antigen OS=Homo sapiens GN=PCNA PE=1 SV=1 - [PCNA_HUMAN]	8.05	1	2	2	2	67.05	8.05	2	2	261	28.7503	4.69092
P01859	Ig gamma-2 chain C region OS=Homo sapiens GN=IGHG2 PE=1 SV=2 - [IGHG2_HUMAN]	7.98	2	1	2	4	140.12	7.98	2	4	326	35.8778	7.59131
O15511	Actin-related protein 2/3 complex subunit 5 OS=Homo sapiens GN=ARPC5 PE=1 SV=3 - [ARPC5_HUMAN]	7.95	2	1	1	2	82.67	7.95	1	2	151	16.3103	5.66846
C9J9K3	40S ribosomal protein SA (Fragment) OS=Homo sapiens GN=RPSA PE=2 SV=1 - [C9J9K3_HUMAN]	7.95	3	2	2	2	86.2172	7.95	2	2	264	29.487	5.24951
P26373-2	Isoform 2 of 60S ribosomal protein L13 OS=Homo sapiens GN=RPL13 - [RL13_HUMAN]	7.93	2	1	1	6	254.353	7.93	1	6	164	18.8334	11.5757
Q71U36-2	Isoform 2 of Tubulin alpha-1A chain OS=Homo sapiens GN=TUBA1A - [TBA1A_HUMAN]	7.93	20	2	2	3	93.09	7.93	2	3	416	46.2678	5.08447
D6RCF2	Histone H2A OS=Homo sapiens GN=H2AFY PE=2 SV=1 - [D6RCF2_HUMAN]	7.88	4	2	2	2	62.19	7.88	2	2	165	17.5639	10.6675
Q9BR76	Coronin-1B OS=Homo sapiens GN=CORO1B PE=1 SV=1 - [COR1B_HUMAN]	7.77	1	2	2	2	73.9434	7.77	2	2	489	54.2003	5.88428
P00966	Argininosuccinate synthase OS=Homo sapiens GN=ASS1 PE=1 SV=2 - [ASSY_HUMAN]	7.77	3	3	3	3	42.0267	7.77	3	3	412	46.501	8.01611
F8WBL2	Bystin OS=Homo sapiens GN=BYSL PE=2 SV=1 - [F8WBL2_HUMAN]	7.73	2	1	1	1	19.47	7.73	1	1	194	21.3807	8.04541
K7EII6	Echinoderm microtubule-associated protein-like 2 (Fragment) OS=Homo sapiens GN=EML2 PE=2 SV=1 - [K7EII6_HUMAN]	7.73	7	1	1	1	16.87	7.73	1	1	181	18.8765	5.13525
M0R0K9	Transcription intermediary factor 1-beta (Fragment) OS=Homo sapiens GN=TRIM28 PE=4 SV=1 - [M0R0K9_HUMAN]	7.61	3	2	2	3	62.9267	7.61	2	3	460	48.4039	4.94482
K7EMV3	Histone H3 OS=Homo sapiens GN=H3F3B PE=2 SV=1 - [K7EMV3_HUMAN]	7.61	10	1	1	1	32.64	7.61	1	1	92	10.3278	11.8247
F5H803	Zinc finger CCHC domain-containing protein 8 (Fragment) OS=Homo sapiens GN=ZCCHC8 PE=2 SV=1 - [F5H803_HUMAN]	7.6	4	1	1	1	20.83	7.6	1	1	171	18.0977	4.65283
Q01105	Protein SET OS=Homo sapiens GN=SET PE=1 SV=3 - [SET_HUMAN]	7.59	1	1	1	1	24.19	7.59	1	1	290	33.4687	4.32275
Q58FF7	Putative heat shock protein HSP 90-beta-3 OS=Homo sapiens GN=HSP90AB3P PE=5 SV=1 - [H90B3_HUMAN]	7.54	2	1	4	6	120.195	7.54	5	6	597	68.282	4.79248
P02749	Beta-2-glycoprotein 1 OS=Homo sapiens GN=APOH PE=1 SV=3 - [APOH_HUMAN]	7.54	3	2	2	2	30.38	7.54	2	2	345	38.2727	7.97217
B4DJP7	Small nuclear ribonucleoprotein Sm D3 OS=Homo sapiens GN=SNRPD3 PE=2 SV=1 - [B4DJP7_HUMAN]	7.5	2	1	1	1	26.51	7.5	1	1	120	13.2829	8.90967
D6RAU2	Guanine nucleotide-binding protein subunit beta-2-like 1 OS=Homo sapiens GN=GNB2L1 PE=2 SV=1 - [D6RAU2_HUMAN]	7.48	11	1	1	1	45.5	7.48	1	1	147	16.3934	9.70068
H0YBJ8	Protein LYRIC (Fragment) OS=Homo sapiens GN=MTDH PE=2 SV=1 - [H0YBJ8_HUMAN]	7.45	3	1	1	1	20.96	7.45	1	1	188	20.559	5.12256
Q5SX90	Rab GDP dissociation inhibitor beta (Fragment) OS=Homo sapiens GN=GDI2 PE=2 SV=1 - [Q5SX90_HUMAN]	7.43	6	1	1	1	33.22	7.43	1	1	148	16.8088	9.72998
B4DMW2	Zinc finger CCCH domain-containing protein 15 OS=Homo sapiens GN=ZC3H15 PE=2 SV=1 - [B4DMW2_HUMAN]	7.41	2	1	1	1	52.42	7.41	1	1	162	18.9357	7.66455
Q01658	Protein Dr1 OS=Homo sapiens GN=DR1 PE=1 SV=1 - [NC2B_HUMAN]	7.39	1	1	1	4	146.67	7.39	1	4	176	19.4317	4.75439
H0YA27	Cyclin-I (Fragment) OS=Homo sapiens GN=CCNI PE=4 SV=1 - [H0YA27_HUMAN]	7.34	3	1	1	1	21.59	7.34	1	1	177	19.8319	6.66846
H0YLQ6	Ceramide synthase 2 OS=Homo sapiens GN=CERS2 PE=2 SV=1 - [H0YLQ6_HUMAN]	7.34	3	1	1	3	27.31	7.34	1	3	218	25.432	7.2251
B1AN99	Trypsin-3 (Fragment) OS=Homo sapiens GN=PRSS3 PE=2 SV=1 - [B1AN99_HUMAN]	7.3	6	1	1	1	54.34	7.3	1	1	178	19.3888	6.07471
B4E241	Serine/arginine-rich-splicing factor 3 OS=Homo sapiens GN=SFRS3 PE=2 SV=1 - [B4E241_HUMAN]	7.26	2	1	1	1	30.19	7.26	1	1	124	14.1942	10.0815
Q8NC51-4	Isoform 4 of Plasminogen activator inhibitor 1 RNA-binding protein OS=Homo sapiens GN=SERBP1 - [PAIRB_HUMAN]	7.24	4	3	3	8	180.71	7.24	3	8	387	42.4013	8.44092
Q13442	28 kDa heat- and acid-stable phosphoprotein OS=Homo sapiens GN=PDAP1 PE=1 SV=1 - [HAP28_HUMAN]	7.18	1	1	1	3	102.92	7.18	1	3	181	20.6176	8.86572
O60814	Histone H2B type 1-K OS=Homo sapiens GN=HIST1H2BK PE=1 SV=3 - [H2B1K_HUMAN]	7.14	17	1	1	14	177.093	7.14	1	14	126	13.8816	10.3159
C9J5G4	Follistatin-related protein 1 (Fragment) OS=Homo sapiens GN=FSTL1 PE=2 SV=1 - [C9J5G4_HUMAN]	7.14	3	1	1	2	50.33	7.14	1	2	140	15.7979	8.1333
Q5TDH0-2	Isoform 2 of Protein DDI1 homolog 2 OS=Homo sapiens GN=DDI2 - [DDI2_HUMAN]	7.11	3	1	1	1	38.35	7.11	1	1	211	23.7062	5.13525
H3BMH2	Ras-related protein Rab-11A (Fragment) OS=Homo sapiens GN=RAB11A PE=2 SV=1 - [H3BMH2_HUMAN]	7.1	7	1	1	2	33.18	7.1	1	2	155	17.6571	8.33838
H0YC33	La-related protein 1 (Fragment) OS=Homo sapiens GN=LARP1 PE=4 SV=1 - [H0YC33_HUMAN]	7.1	4	1	1	1	35.1	7.1	1	1	183	20.8776	9.67139
P11021	78 kDa glucose-regulated protein OS=Homo sapiens GN=HSPA5 PE=1 SV=2 - [GRP78_HUMAN]	7.03	9	3	4	13	194.794	7.03	4	13	654	72.2884	5.16064
P18621-3	Isoform 3 of 60S ribosomal protein L17 OS=Homo sapiens GN=RPL17 - [RL17_HUMAN]	7.02	1	1	1	1	0	7.02	1	1	228	26.3557	10.0962
Q8NDC0	MAPK-interacting and spindle-stabilizing protein-like OS=Homo sapiens GN=MAPK1IP1L PE=1 SV=4 - [MISSL_HUMAN]	6.94	1	1	1	2	48	6.94	1	2	245	24.2535	5.61768
O60493-2	Isoform 2 of Sorting nexin-3 OS=Homo sapiens GN=SNX3 - [SNX3_HUMAN]	6.92	3	1	1	2	33.9498	6.92	1	2	130	14.7566	7.44482
A6NFY0	55 kDa erythrocyte membrane protein (Fragment) OS=Homo sapiens GN=MPP1 PE=2 SV=1 - [A6NFY0_HUMAN]	6.87	5	1	1	1	29.36	6.87	1	1	131	14.1342	7.1958
C9JUG7	F-actin-capping protein subunit alpha-2 OS=Homo sapiens GN=CAPZA2 PE=2 SV=1 - [C9JUG7_HUMAN]	6.85	5	1	1	1	41.6	6.85	1	1	146	16.6883	5.10986
E9PG46	AP2-associated protein kinase 1 OS=Homo sapiens GN=AAK1 PE=2 SV=1 - [E9PG46_HUMAN]	6.82	3	3	3	3	59.2733	6.82	3	3	674	73.7236	9.1001
M0QZC5	40S ribosomal protein S11 OS=Homo sapiens GN=RPS11 PE=4 SV=1 - [M0QZC5_HUMAN]	6.78	2	1	1	1	58.99	6.78	1	1	118	13.9885	10.3159
F5H2A7	Prefoldin subunit 3 OS=Homo sapiens GN=VBP1 PE=2 SV=1 - [F5H2A7_HUMAN]	6.77	2	1	1	1	43.26	6.77	1	1	192	22.2722	6.59521
A2A2V4	Vascular endothelial growth factor A OS=Homo sapiens GN=VEGFA PE=2 SV=1 - [A2A2V4_HUMAN]	6.75	16	1	1	1	18.38	6.75	1	1	163	18.9848	7.48877
Q12904	Aminoacyl tRNA synthase complex-interacting multifunctional protein 1 OS=Homo sapiens GN=AIMP1 PE=1 SV=2 - [AIMP1_HUMAN]	6.73	2	1	1	1	25.7	6.73	1	1	312	34.3311	8.42627
F5H1I8	X-ray repair cross-complementing protein 6 OS=Homo sapiens GN=XRCC6 PE=2 SV=1 - [F5H1I8_HUMAN]	6.72	4	3	3	4	64.9314	6.72	3	4	476	54.5168	8.95361
Q15691	Microtubule-associated protein RP/EB family member 1 OS=Homo sapiens GN=MAPRE1 PE=1 SV=3 - [MARE1_HUMAN]	6.72	1	1	1	4	50.53	6.72	1	4	268	29.9802	5.13525
D6RG15	Twinfilin-2 OS=Homo sapiens GN=TWF2 PE=2 SV=1 - [D6RG15_HUMAN]	6.69	3	1	1	1	55.01	6.69	1	1	254	28.8648	6.12549
E7EQR4	Ezrin OS=Homo sapiens GN=EZR PE=2 SV=2 - [E7EQR4_HUMAN]	6.68	5	2	4	4	69.78	6.68	4	4	554	65.5386	5.90967
Q9Y383-3	Isoform 3 of Putative RNA-binding protein Luc7-like 2 OS=Homo sapiens GN=LUC7L2 - [LC7L2_HUMAN]	6.68	10	2	2	2	41.95	6.68	2	2	389	46.2006	10.0522
P08621-3	Isoform 3 of U1 small nuclear ribonucleoprotein 70 kDa OS=Homo sapiens GN=SNRNP70 - [RU17_HUMAN]	6.63	3	1	1	2	32.27	6.63	1	2	166	19.7779	8.03076
P19338	Nucleolin OS=Homo sapiens GN=NCL PE=1 SV=3 - [NUCL_HUMAN]	6.62	2	4	4	6	165.849	6.62	4	6	710	76.5684	4.70361
S4R3J5	DnaJ homolog subfamily C member 8 (Fragment) OS=Homo sapiens GN=DNAJC8 PE=4 SV=1 - [S4R3J5_HUMAN]	6.6	2	1	1	2	30.76	6.6	1	2	106	13.0819	10.2134
P23588	Eukaryotic translation initiation factor 4B OS=Homo sapiens GN=EIF4B PE=1 SV=2 - [IF4B_HUMAN]	6.55	9	3	3	6	111.12	6.55	4	6	611	69.1103	5.73193
Q02790	Peptidyl-prolyl cis-trans isomerase FKBP4 OS=Homo sapiens GN=FKBP4 PE=1 SV=3 - [FKBP4_HUMAN]	6.54	2	2	2	2	22.41	6.54	2	2	459	51.7721	5.42725
K7ESK7	SUMO-activating enzyme subunit 2 (Fragment) OS=Homo sapiens GN=UBA2 PE=4 SV=1 - [K7ESK7_HUMAN]	6.51	3	1	1	1	41.31	6.51	1	1	215	23.9893	5.35107
O75396	Vesicle-trafficking protein SEC22b OS=Homo sapiens GN=SEC22B PE=1 SV=4 - [SC22B_HUMAN]	6.51	1	1	1	2	112.96	6.51	1	2	215	24.5775	6.91748
F6U0H7	HLA class I histocompatibility antigen, B-56 alpha chain (Fragment) OS=Homo sapiens GN=HLA-B PE=2 SV=1 - [F6U0H7_HUMAN]	6.5	33	1	1	1	36.96	6.5	1	1	246	27.8033	5.85889
E9PKB5	Protein phosphatase 1A (Fragment) OS=Homo sapiens GN=PPM1A PE=2 SV=1 - [E9PKB5_HUMAN]	6.42	10	1	1	1	40.28	6.42	1	1	187	20.6311	7.91357
Q8NG80	Olfactory receptor 2L5 OS=Homo sapiens GN=OR2L5 PE=3 SV=1 - [OR2L5_HUMAN]	6.41	1	1	1	1	0	6.41	1	1	312	35.6242	8.60205
F5H853	Defensin-6 OS=Homo sapiens GN=DEF6 PE=2 SV=1 - [F5H853_HUMAN]	6.38	2	2	2	3	107.93	6.38	2	3	376	44.3496	7.06396
P50552	Vasodilator-stimulated phosphoprotein OS=Homo sapiens GN=VASP PE=1 SV=3 - [VASP_HUMAN]	6.32	2	2	2	2	109.238	6.32	2	2	380	39.8051	8.93896
Q9BSD7	Cancer-related nucleoside-triphosphatase OS=Homo sapiens GN=NTPCR PE=1 SV=1 - [NTPCR_HUMAN]	6.32	2	1	1	1	22.8	6.32	1	1	190	20.7001	9.53955
P18669	Phosphoglycerate mutase 1 OS=Homo sapiens GN=PGAM1 PE=1 SV=2 - [PGAM1_HUMAN]	6.3	1	1	1	2	19.47	6.3	1	2	254	28.7858	7.18115
P13639	Elongation factor 2 OS=Homo sapiens GN=EEF2 PE=1 SV=4 - [EF2_HUMAN]	6.29	2	4	5	6	74.46	6.29	5	6	858	95.277	6.82959
B5MCT7	Protein phosphatase 1F OS=Homo sapiens GN=PPM1F PE=2 SV=1 - [B5MCT7_HUMAN]	6.29	3	1	1	1	40.46	6.29	1	1	286	31.2437	5.77002
P55290-3	Isoform 3 of Cadherin-13 OS=Homo sapiens GN=CDH13 - [CAD13_HUMAN]	6.29	4	1	1	2	21.17	6.29	1	2	175	19.6474	8.47021
O15400-2	Isoform 2 of Syntaxin-7 OS=Homo sapiens GN=STX7 - [STX7_HUMAN]	6.28	2	1	1	1	70.98	6.28	1	1	239	27.3837	5.12256
Q5TDI3	Nuclear pore complex protein Nup133 OS=Homo sapiens GN=NUP133 PE=2 SV=1 - [Q5TDI3_HUMAN]	6.25	3	1	1	1	32.55	6.25	1	1	224	23.8362	8.27979
P03185	Virion egress protein BFRF1 OS=Epstein-Barr virus (strain B95-8) GN=BFRF1 PE=1 SV=1 - [UL34_EBVB9]	6.25	3	2	2	2	34.78	6.25	2	2	336	37.6079	8.30908
H0YLC7	Fumarylacetoacetase (Fragment) OS=Homo sapiens GN=FAH PE=2 SV=1 - [H0YLC7_HUMAN]	6.21	2	1	1	2	24.28	6.21	1	2	161	18.0151	7.1958
G5E968	Chromogranin A (Parathyroid secretory protein 1), isoform CRA_b OS=Homo sapiens GN=CHGA PE=2 SV=1 - [G5E968_HUMAN]	6.21	2	1	1	1	30.74	6.21	1	1	306	34.2481	4.94482
B7Z359	Synaptophysin OS=Homo sapiens GN=SYP PE=2 SV=1 - [B7Z359_HUMAN]	6.15	1	1	1	2	28.5	6.15	1	2	195	20.7439	5.0083
F5H6L8	Hepatocyte growth factor-like protein alpha chain OS=Homo sapiens GN=MST1 PE=2 SV=1 - [F5H6L8_HUMAN]	6.1	3	1	1	1	32.4	6.1	1	1	164	17.851	9.39307
Q6UWP8	Suprabasin OS=Homo sapiens GN=SBSN PE=2 SV=2 - [SBSN_HUMAN]	6.1	1	1	1	1	40.58	6.1	1	1	590	60.5046	7.00537
P61160	Actin-related protein 2 OS=Homo sapiens GN=ACTR2 PE=1 SV=1 - [ARP2_HUMAN]	6.09	3	2	2	4	107.4	6.09	2	4	394	44.7322	6.7417
P51991	Heterogeneous nuclear ribonucleoprotein A3 OS=Homo sapiens GN=HNRNPA3 PE=1 SV=2 - [ROA3_HUMAN]	6.08	11	1	2	10	55.4367	6.08	2	10	378	39.5706	9.01221
P07339	Cathepsin D OS=Homo sapiens GN=CTSD PE=1 SV=1 - [CATD_HUMAN]	6.07	5	2	2	2	69.57	6.07	2	2	412	44.5236	6.53662
P31146	Coronin-1A OS=Homo sapiens GN=CORO1A PE=1 SV=4 - [COR1A_HUMAN]	6.07	2	4	4	17	714.708	6.07	5	17	461	50.9938	6.68311
B0QYA4	Eukaryotic translation initiation factor 3 subunit D (Fragment) OS=Homo sapiens GN=EIF3D PE=2 SV=1 - [B0QYA4_HUMAN]	6.06	4	1	1	1	40.2	6.06	1	1	165	19.1193	7.76709
P23526	Adenosylhomocysteinase OS=Homo sapiens GN=AHCY PE=1 SV=4 - [SAHH_HUMAN]	6.02	2	2	2	2	49.15	6.02	2	2	432	47.6852	6.34131
Q5T985	Inter-alpha-trypsin inhibitor heavy chain H2 OS=Homo sapiens GN=ITIH2 PE=2 SV=1 - [Q5T985_HUMAN]	5.99	2	5	5	13	313.306	5.99	5	13	935	105.15	7.03467
P62269	40S ribosomal protein S18 OS=Homo sapiens GN=RPS18 PE=1 SV=3 - [RS18_HUMAN]	5.92	1	1	1	4	98.82	5.92	1	4	152	17.7079	10.9897
P04220	Ig mu heavy chain disease protein OS=Homo sapiens PE=1 SV=1 - [MUCB_HUMAN]	5.88	3	2	2	5	130.32	5.88	2	5	391	43.0303	5.23682
Q16610-3	Isoform 3 of Extracellular matrix protein 1 OS=Homo sapiens GN=ECM1 - [ECM1_HUMAN]	5.88	4	1	1	3	79.0667	5.88	1	3	170	19.0575	7.18115
K7ENG2	Splicing factor U2AF 65 kDa subunit OS=Homo sapiens GN=U2AF2 PE=2 SV=1 - [K7ENG2_HUMAN]	5.86	3	1	1	1	0	5.86	1	1	307	33.8799	5.03369
Q9NR45	Sialic acid synthase OS=Homo sapiens GN=NANS PE=1 SV=2 - [SIAS_HUMAN]	5.85	1	1	1	1	25.27	5.85	1	1	359	40.2815	6.7417
P19105	Myosin regulatory light chain 12A OS=Homo sapiens GN=MYL12A PE=1 SV=2 - [ML12A_HUMAN]	5.85	3	1	1	1	26.91	5.85	1	1	171	19.7815	4.80518
H0Y3Z3	Protein disulfide-isomerase (Fragment) OS=Homo sapiens GN=P4HB PE=3 SV=1 - [H0Y3Z3_HUMAN]	5.84	9	2	2	3	33.78	5.84	2	3	274	31.5234	4.62744
A2ABF4	Valine--tRNA ligase (Fragment) OS=Homo sapiens GN=VARS PE=2 SV=1 - [A2ABF4_HUMAN]	5.75	2	1	1	1	23.78	5.75	1	1	174	18.1025	6.771
P36955	Pigment epithelium-derived factor OS=Homo sapiens GN=SERPINF1 PE=1 SV=4 - [PEDF_HUMAN]	5.74	4	2	2	3	69.53	5.74	2	3	418	46.2833	6.37939
P14625	Endoplasmin OS=Homo sapiens GN=HSP90B1 PE=1 SV=1 - [ENPL_HUMAN]	5.73	4	3	5	8	252.815	5.73	5	8	803	92.4113	4.84326
H3BM89	60S ribosomal protein L4 OS=Homo sapiens GN=RPL4 PE=2 SV=1 - [H3BM89_HUMAN]	5.71	2	1	1	1	32.74	5.71	1	1	333	37.6332	11.0337
Q9Y265-2	Isoform 2 of RuvB-like 1 OS=Homo sapiens GN=RUVBL1 - [RUVB1_HUMAN]	5.7	3	2	2	2	47.09	5.7	2	2	386	42.1	6.37939
Q9UMY4-3	Isoform 3 of Sorting nexin-12 OS=Homo sapiens GN=SNX12 - [SNX12_HUMAN]	5.7	3	1	1	1	33.52	5.7	1	1	158	18.3304	7.29834
E9PLG2	26S protease regulatory subunit 6A (Fragment) OS=Homo sapiens GN=PSMC3 PE=2 SV=2 - [E9PLG2_HUMAN]	5.7	6	1	1	1	17.51	5.7	1	1	193	21.5292	5.09717
Q86SG2-2	Isoform 2 of Ankyrin repeat domain-containing protein 23 OS=Homo sapiens GN=ANKRD23 - [ANR23_HUMAN]	5.7	2	1	1	1	32.61	5.7	1	1	263	29.6649	9.99365
Q07666-3	Isoform 3 of KH domain-containing, RNA-binding, signal transduction-associated protein 1 OS=Homo sapiens GN=KHDRBS1 - [KHDR1_HUMAN]	5.69	3	2	2	2	65.97	5.69	2	2	404	43.9999	7.28369
P35579	Myosin-9 OS=Homo sapiens GN=MYH9 PE=1 SV=4 - [MYH9_HUMAN]	5.66	4	9	9	15	243.298	5.66	9	15	1960	226.392	5.60498
P10809	60 kDa heat shock protein, mitochondrial OS=Homo sapiens GN=HSPD1 PE=1 SV=2 - [CH60_HUMAN]	5.58	3	3	3	7	138.57	5.58	3	7	573	61.0164	5.87158
K7EKL8	Intercellular adhesion molecule 1 (Fragment) OS=Homo sapiens GN=ICAM1 PE=2 SV=1 - [K7EKL8_HUMAN]	5.56	2	1	1	1	21.42	5.56	1	1	180	19.4311	7.18115
B4DX42	Steroidogenic factor 1 OS=Homo sapiens GN=SF1 PE=2 SV=1 - [B4DX42_HUMAN]	5.54	9	2	2	2	38.55	5.54	2	2	433	46.391	9.34912
O15296-3	Isoform C of Arachidonate 15-lipoxygenase B OS=Homo sapiens GN=ALOX15B - [LX15B_HUMAN]	5.51	4	3	3	5	102.52	5.51	3	5	617	69.0923	6.93213
M0QYS5	DNA repair protein XRCC1 (Fragment) OS=Homo sapiens GN=XRCC1 PE=4 SV=1 - [M0QYS5_HUMAN]	5.48	3	1	1	1	28.83	5.48	1	1	292	31.3672	9.5835
P30085-2	Isoform 2 of UMP-CMP kinase OS=Homo sapiens GN=CMPK1 - [KCY_HUMAN]	5.44	3	1	1	1	0	5.44	1	1	147	16.5372	5.12256
Q9H1E3-2	Isoform 2 of Nuclear ubiquitous casein and cyclin-dependent kinase substrate 1 OS=Homo sapiens GN=NUCKS1 - [NUCKS_HUMAN]	5.42	2	1	1	2	66.16	5.42	2	2	203	22.7618	4.93213
G8JL88	Apolipoprotein L1 OS=Homo sapiens GN=APOL1 PE=2 SV=1 - [G8JL88_HUMAN]	5.42	4	1	1	2	38.4	5.42	1	2	277	30.8383	7.6499
Q16555-2	Isoform 2 of Dihydropyrimidinase-related protein 2 OS=Homo sapiens GN=DPYSL2 - [DPYL2_HUMAN]	5.41	6	2	2	2	74.03	5.41	2	2	536	58.1264	6.15088
Q9Y3C8	Ubiquitin-fold modifier-conjugating enzyme 1 OS=Homo sapiens GN=UFC1 PE=1 SV=3 - [UFC1_HUMAN]	5.39	1	1	1	2	27.65	5.39	1	2	167	19.446	7.40088
Q9UG54	Mitogen-activated protein kinase kinase kinase 7 OS=Homo sapiens GN=DKFZp586F0420 PE=2 SV=1 - [Q9UG54_HUMAN]	5.38	5	1	1	1	69.53	5.38	1	1	260	28.8523	7.40088
Q04760-2	Isoform 2 of Lactoylglutathione lyase OS=Homo sapiens GN=GLO1 - [LGUL_HUMAN]	5.33	2	1	1	2	21.58	5.33	1	2	169	19.0306	6.04932
B1ALD9	Periostin OS=Homo sapiens GN=POSTN PE=2 SV=1 - [B1ALD9_HUMAN]	5.32	3	1	5	8	65.8215	5.32	5	8	808	90.0866	7.94287
P22352	Glutathione peroxidase 3 OS=Homo sapiens GN=GPX3 PE=1 SV=2 - [GPX3_HUMAN]	5.31	1	1	1	1	44.09	5.31	1	1	226	25.5369	8.1333
Q96AE4	Far upstream element-binding protein 1 OS=Homo sapiens GN=FUBP1 PE=1 SV=3 - [FUBP1_HUMAN]	5.28	5	3	3	5	126.133	5.28	3	5	644	67.5185	7.60596
D6RIU4	Vesicular integral-membrane protein VIP36 (Fragment) OS=Homo sapiens GN=LMAN2 PE=2 SV=1 - [D6RIU4_HUMAN]	5.21	4	1	1	1	51.99	5.21	1	1	192	21.9336	6.52197
H0YJN0	Ena/VASP-like protein (Fragment) OS=Homo sapiens GN=EVL PE=2 SV=1 - [H0YJN0_HUMAN]	5.19	3	1	1	1	38.08	5.19	1	1	212	22.043	6.1001
B4DXY7	4-trimethylaminobutyraldehyde dehydrogenase OS=Homo sapiens GN=ALDH9A1 PE=2 SV=1 - [B4DXY7_HUMAN]	5.19	2	2	2	2	38.75	5.19	2	2	424	46.4243	5.5415
P17900	Ganglioside GM2 activator OS=Homo sapiens GN=GM2A PE=1 SV=4 - [SAP3_HUMAN]	5.18	1	1	1	1	43.01	5.18	1	1	193	20.8247	5.31299
C9JXK9	Lipoma-preferred partner (Fragment) OS=Homo sapiens GN=LPP PE=2 SV=1 - [C9JXK9_HUMAN]	5.16	3	1	1	1	19.94	5.16	1	1	252	26.6899	7.85498
Q13177	Serine/threonine-protein kinase PAK 2 OS=Homo sapiens GN=PAK2 PE=1 SV=3 - [PAK2_HUMAN]	5.15	6	2	2	7	214.086	5.15	3	7	524	58.0059	5.96045
P40227-2	Isoform 2 of T-complex protein 1 subunit zeta OS=Homo sapiens GN=CCT6A - [TCPZ_HUMAN]	5.14	6	3	3	3	69.6353	5.14	3	3	486	53.2551	7.26904
G3V555	Heterogeneous nuclear ribonucleoproteins C1/C2 (Fragment) OS=Homo sapiens GN=HNRNPC PE=2 SV=1 - [G3V555_HUMAN]	5.14	13	1	1	3	71.86	5.14	1	3	175	19.1658	9.94971
Q15063	Periostin OS=Homo sapiens GN=POSTN PE=1 SV=2 - [POSTN_HUMAN]	5.14	4	1	5	11	109.971	5.14	5	11	836	93.2553	7.53271
P01024	Complement C3 OS=Homo sapiens GN=C3 PE=1 SV=2 - [CO3_HUMAN]	5.11	1	7	7	12	187.78	5.11	7	12	1663	187.03	6.40479
Q06033-2	Isoform 2 of Inter-alpha-trypsin inhibitor heavy chain H3 OS=Homo sapiens GN=ITIH3 - [ITIH3_HUMAN]	5.08	3	5	5	15	239.952	5.08	5	15	886	99.2653	5.79541
Q9HAB8-2	Isoform 2 of Phosphopantothenate--cysteine ligase OS=Homo sapiens GN=PPCS - [PPCS_HUMAN]	5.07	2	1	1	1	30.29	5.07	1	1	138	15.6353	5.88428
Q06828	Fibromodulin OS=Homo sapiens GN=FMOD PE=1 SV=2 - [FMOD_HUMAN]	5.05	1	2	2	2	65.5859	5.05	2	2	376	43.1515	6.03662
F5GWU3	Enoyl-CoA hydratase domain-containing protein 2, mitochondrial (Fragment) OS=Homo sapiens GN=ECHDC2 PE=2 SV=1 - [F5GWU3_HUMAN]	5.02	4	1	1	1	36.79	5.02	1	1	219	23.4773	8.104
P01877	Ig alpha-2 chain C region OS=Homo sapiens GN=IGHA2 PE=1 SV=3 - [IGHA2_HUMAN]	5	2	2	2	4	48.63	5	2	4	340	36.503	6.1001
F8WCR1	60S ribosomal protein L3 OS=Homo sapiens GN=RPL3 PE=2 SV=1 - [F8WCR1_HUMAN]	5	4	1	1	1	38.98	5	1	1	180	19.7554	9.94971
P26196	Probable ATP-dependent RNA helicase DDX6 OS=Homo sapiens GN=DDX6 PE=1 SV=2 - [DDX6_HUMAN]	4.97	1	1	1	4	81.23	4.97	1	4	483	54.3823	8.66064
H0YJL4	Poly(A) polymerase alpha (Fragment) OS=Homo sapiens GN=PAPOLA PE=4 SV=1 - [H0YJL4_HUMAN]	4.97	4	1	1	1	30.77	4.97	1	1	181	18.4594	9.59814
P12814-2	Isoform 2 of Alpha-actinin-1 OS=Homo sapiens GN=ACTN1 - [ACTN1_HUMAN]	4.96	14	2	4	5	112.83	4.96	4	5	887	102.644	5.50342
Q8IZP0-11	Isoform 11 of Abl interactor 1 OS=Homo sapiens GN=ABI1 - [ABI1_HUMAN]	4.86	16	1	1	1	51.42	4.86	1	1	329	35.8976	5.05908
Q8NBJ4-2	Isoform 2 of Golgi membrane protein 1 OS=Homo sapiens GN=GOLM1 - [GOLM1_HUMAN]	4.86	2	2	2	2	45.2303	4.86	2	2	391	44.2463	4.90674
Q00839-2	Isoform Short of Heterogeneous nuclear ribonucleoprotein U OS=Homo sapiens GN=HNRNPU - [HNRPU_HUMAN]	4.84	2	2	2	7	133.69	4.84	2	7	806	88.9242	5.78271
P18124	60S ribosomal protein L7 OS=Homo sapiens GN=RPL7 PE=1 SV=1 - [RL7_HUMAN]	4.84	1	2	2	2	37.46	4.84	2	2	248	29.2072	10.6528
E9PL19	Poly(U)-binding-splicing factor PUF60 (Fragment) OS=Homo sapiens GN=PUF60 PE=2 SV=1 - [E9PL19_HUMAN]	4.82	7	1	1	1	21.53	4.82	1	1	228	24.7414	7.85498
P04406	Glyceraldehyde-3-phosphate dehydrogenase OS=Homo sapiens GN=GAPDH PE=1 SV=3 - [G3P_HUMAN]	4.78	3	2	2	5	83.79	4.78	2	5	335	36.0304	8.45557
H0Y875	Calumenin (Fragment) OS=Homo sapiens GN=CALU PE=4 SV=1 - [H0Y875_HUMAN]	4.76	6	1	1	1	29	4.76	1	1	147	17.359	4.42432
O43290	U4/U6.U5 tri-snRNP-associated protein 1 OS=Homo sapiens GN=SART1 PE=1 SV=1 - [SNUT1_HUMAN]	4.75	2	2	2	3	49.87	4.75	2	3	800	90.2003	6.12549
P53004	Biliverdin reductase A OS=Homo sapiens GN=BLVRA PE=1 SV=2 - [BIEA_HUMAN]	4.73	1	1	1	1	19.81	4.73	1	1	296	33.4073	6.44287
Q7Z5L9-2	Isoform 2 of Interferon regulatory factor 2-binding protein 2 OS=Homo sapiens GN=IRF2BP2 - [I2BP2_HUMAN]	4.73	2	2	2	2	43.88	4.73	2	2	571	59.4439	8.60205
Q13449	Limbic system-associated membrane protein OS=Homo sapiens GN=LSAMP PE=1 SV=2 - [LSAMP_HUMAN]	4.73	3	1	1	1	33.43	4.73	1	1	338	37.3702	6.97607
Q13094	Lymphocyte cytosolic protein 2 OS=Homo sapiens GN=LCP2 PE=1 SV=1 - [LCP2_HUMAN]	4.69	2	2	2	2	70.23	4.69	2	2	533	60.1511	6.26514
P24158	Myeloblastin OS=Homo sapiens GN=PRTN3 PE=1 SV=3 - [PRTN3_HUMAN]	4.69	1	1	1	2	51.87	4.69	1	2	256	27.7893	8.35303
Q04637-5	Isoform D of Eukaryotic translation initiation factor 4 gamma 1 OS=Homo sapiens GN=EIF4G1 - [IF4G1_HUMAN]	4.67	18	5	5	5	92.6	4.67	5	5	1435	158.419	5.21143
Q92572	AP-3 complex subunit sigma-1 OS=Homo sapiens GN=AP3S1 PE=1 SV=1 - [AP3S1_HUMAN]	4.66	1	1	1	1	40.45	4.66	1	1	193	21.7181	5.38916
J3QRP6	Na(+)/H(+) exchange regulatory cofactor NHE-RF1 (Fragment) OS=Homo sapiens GN=SLC9A3R1 PE=2 SV=1 - [J3QRP6_HUMAN]	4.65	2	1	1	1	34.2	4.65	1	1	215	22.8575	4.81787
F5GXQ1	35 kDa inter-alpha-trypsin inhibitor heavy chain H4 OS=Homo sapiens GN=ITIH4 PE=2 SV=1 - [F5GXQ1_HUMAN]	4.64	7	3	3	4	57.7179	4.64	3	4	560	62.0947	5.51611
O95831-6	Isoform 6 of Apoptosis-inducing factor 1, mitochondrial OS=Homo sapiens GN=AIFM1 - [AIFM1_HUMAN]	4.64	4	1	1	1	62.7	4.64	1	1	237	26.0167	9.21729
P48643	T-complex protein 1 subunit epsilon OS=Homo sapiens GN=CCT5 PE=1 SV=1 - [TCPE_HUMAN]	4.62	7	3	3	4	53.6378	4.62	3	4	541	59.6328	5.65576
P53597	Succinyl-CoA ligase [ADP/GDP-forming] subunit alpha, mitochondrial OS=Homo sapiens GN=SUCLG1 PE=1 SV=4 - [SUCA_HUMAN]	4.62	1	1	1	1	32.9	4.62	1	1	346	36.2268	8.79248
P07357	Complement component C8 alpha chain OS=Homo sapiens GN=C8A PE=1 SV=2 - [CO8A_HUMAN]	4.62	1	2	2	2	57.07	4.62	2	2	584	65.121	6.46826
B4DX52	DnaJ homolog subfamily B member 1 OS=Homo sapiens GN=DNAJB1 PE=2 SV=1 - [B4DX52_HUMAN]	4.58	2	1	1	1	44.42	4.58	1	1	240	26.999	8.96826
D6RGJ1	Complement C1q subcomponent subunit B (Fragment) OS=Homo sapiens GN=C1QB PE=2 SV=1 - [D6RGJ1_HUMAN]	4.58	4	1	1	1	35.74	4.58	1	1	153	15.5151	8.68994
A6NLN1	Polypyrimidine tract binding protein 1, isoform CRA_e OS=Homo sapiens GN=PTBP1 PE=2 SV=3 - [A6NLN1_HUMAN]	4.57	4	1	1	1	52.96	4.57	1	1	197	21.8995	9.5542
P35637-2	Isoform Short of RNA-binding protein FUS OS=Homo sapiens GN=FUS - [FUS_HUMAN]	4.57	3	1	1	2	138.92	4.57	2	2	525	53.3228	9.36377
P41227-2	Isoform 2 of N-alpha-acetyltransferase 10 OS=Homo sapiens GN=NAA10 - [NAA10_HUMAN]	4.55	2	1	1	1	41.64	4.55	1	1	220	24.768	5.51611
E9PPQ8	Nuclear autoantigenic sperm protein (Fragment) OS=Homo sapiens GN=NASP PE=2 SV=1 - [E9PPQ8_HUMAN]	4.55	6	1	1	2	32.5878	4.55	1	2	154	16.6638	4.09424
B7Z9L0	T-complex protein 1 subunit delta OS=Homo sapiens GN=CCT4 PE=2 SV=1 - [B7Z9L0_HUMAN]	4.55	4	2	2	4	63.41	4.55	2	4	483	52.2979	6.56592
Q9UPN7	Serine/threonine-protein phosphatase 6 regulatory subunit 1 OS=Homo sapiens GN=PPP6R1 PE=1 SV=5 - [PP6R1_HUMAN]	4.54	1	2	2	2	22.64	4.54	2	2	881	96.6637	4.55127
I3L404	40S ribosomal protein S2 (Fragment) OS=Homo sapiens GN=RPS2 PE=2 SV=1 - [I3L404_HUMAN]	4.52	6	1	1	1	30.76	4.52	1	1	155	16.5549	10.0669
Q00341-2	Isoform 2 of Vigilin OS=Homo sapiens GN=HDLBP - [VIGLN_HUMAN]	4.45	5	4	4	5	30.4733	4.45	4	5	1235	137.901	6.88818
P20810-3	Isoform 3 of Calpastatin OS=Homo sapiens GN=CAST - [ICAL_HUMAN]	4.41	26	2	2	3	56.12	4.41	2	3	590	63.6266	4.79248
P19827	Inter-alpha-trypsin inhibitor heavy chain H1 OS=Homo sapiens GN=ITIH1 PE=1 SV=3 - [ITIH1_HUMAN]	4.39	6	2	2	7	203.814	4.39	2	7	911	101.326	6.78564
P28799	Granulins OS=Homo sapiens GN=GRN PE=1 SV=2 - [GRN_HUMAN]	4.38	6	2	2	2	42.93	4.38	2	2	593	63.4998	6.82959
F5GXS0	C4b-B OS=Homo sapiens GN=C4B PE=2 SV=1 - [F5GXS0_HUMAN]	4.36	5	5	5	12	270.825	4.36	5	12	1698	187.552	7.32764
P02675	Fibrinogen beta chain OS=Homo sapiens GN=FGB PE=1 SV=2 - [FIBB_HUMAN]	4.28	1	1	1	2	15.98	4.28	1	2	491	55.8923	8.26514
F8W079	ATP synthase subunit beta, mitochondrial (Fragment) OS=Homo sapiens GN=ATP5B PE=2 SV=1 - [F8W079_HUMAN]	4.23	4	1	1	1	28.11	4.23	1	1	284	30.151	8.29443
P08697-2	Isoform 2 of Alpha-2-antiplasmin OS=Homo sapiens GN=SERPINF2 - [A2AP_HUMAN]	4.22	3	2	2	3	76.02	4.22	2	3	427	47.8766	6.1001
E9PK52	Band 4.1-like protein 2 OS=Homo sapiens GN=EPB41L2 PE=2 SV=1 - [E9PK52_HUMAN]	4.19	21	3	3	3	99.1113	4.19	3	3	811	90.9414	5.85889
K7EPW7	Glucosidase 2 subunit beta (Fragment) OS=Homo sapiens GN=PRKCSH PE=2 SV=1 - [K7EPW7_HUMAN]	4.17	4	1	1	2	42.94	4.17	1	2	168	18.9462	5.96045
P37235	Hippocalcin-like protein 1 OS=Homo sapiens GN=HPCAL1 PE=1 SV=3 - [HPCL1_HUMAN]	4.15	3	1	1	1	30.11	4.15	1	1	193	22.299	5.35107
D6R9H8	Polyadenylate-binding protein-interacting protein 1 OS=Homo sapiens GN=PAIP1 PE=2 SV=1 - [D6R9H8_HUMAN]	4.14	2	1	1	1	44.63	4.14	1	1	266	29.1592	5.46533
B2RCS5	Actinin, alpha 2, isoform CRA_b OS=Homo sapiens GN=ACTN2 PE=2 SV=1 - [B2RCS5_HUMAN]	4.14	6	1	3	3	63.09	4.14	3	3	894	103.854	5.51611
P09874	Poly [ADP-ribose] polymerase 1 OS=Homo sapiens GN=PARP1 PE=1 SV=4 - [PARP1_HUMAN]	4.14	1	3	3	3	79.93	4.14	3	3	1014	113.012	8.88037
M0QZH0	Reticulocalbin-3 (Fragment) OS=Homo sapiens GN=RCN3 PE=4 SV=1 - [M0QZH0_HUMAN]	4.14	2	1	1	1	45.79	4.14	1	1	169	19.8007	4.98291
P05062	Fructose-bisphosphate aldolase B OS=Homo sapiens GN=ALDOB PE=1 SV=2 - [ALDOB_HUMAN]	4.12	1	1	1	1	45.63	4.12	1	1	364	39.4481	7.86963
P23352	Anosmin-1 OS=Homo sapiens GN=KAL1 PE=1 SV=3 - [KALM_HUMAN]	4.12	1	2	2	2	39.97	4.12	2	2	680	76.0636	9.15869
P02771	Alpha-fetoprotein OS=Homo sapiens GN=AFP PE=1 SV=1 - [FETA_HUMAN]	4.11	2	3	3	8	66.23	4.11	3	8	609	68.633	5.68115
Q09028-4	Isoform 4 of Histone-binding protein RBBP4 OS=Homo sapiens GN=RBBP4 - [RBBP4_HUMAN]	4.1	4	1	1	2	139.94	4.1	1	2	390	43.455	4.95752
Q8WXF1-2	Isoform 2 of Paraspeckle component 1 OS=Homo sapiens GN=PSPC1 - [PSPC1_HUMAN]	4.07	2	1	1	1	20.57	4.07	1	1	393	45.5423	6.58057
Q9BY44-2	Isoform 2 of Eukaryotic translation initiation factor 2A OS=Homo sapiens GN=EIF2A - [EIF2A_HUMAN]	4.04	5	1	1	1	28.22	4.04	1	1	371	41.3133	8.73389
P02671-2	Isoform 2 of Fibrinogen alpha chain OS=Homo sapiens GN=FGA - [FIBA_HUMAN]	4.04	2	2	2	3	64.0167	4.04	2	3	644	69.7138	8.06006
F2Z2K0	NSFL1 cofactor p47 OS=Homo sapiens GN=NSFL1C PE=2 SV=1 - [F2Z2K0_HUMAN]	4.01	5	1	1	1	59.45	4.01	1	1	274	30.2019	5.09717
P06858	Lipoprotein lipase OS=Homo sapiens GN=LPL PE=1 SV=1 - [LIPL_HUMAN]	4	1	1	1	1	67.21	4	1	1	475	53.1289	8.14795
Q5VSN0	SH3 domain-containing kinase-binding protein 1 OS=Homo sapiens GN=SH3KBP1 PE=2 SV=1 - [Q5VSN0_HUMAN]	3.98	6	2	2	3	17.66	3.98	2	3	553	61.3954	7.85498
H0Y5Q9	Phosphatidylinositol 3,4,5-trisphosphate 5-phosphatase 1 (Fragment) OS=Homo sapiens GN=INPP5D PE=2 SV=1 - [H0Y5Q9_HUMAN]	3.95	6	2	2	5	71.0467	3.95	2	5	810	90.5039	8.19189
P26641	Elongation factor 1-gamma OS=Homo sapiens GN=EEF1G PE=1 SV=3 - [EF1G_HUMAN]	3.89	2	2	2	3	48.3	3.89	2	3	437	50.0871	6.66846
B7Z254	Protein disulfide-isomerase A6 OS=Homo sapiens GN=PDIA6 PE=2 SV=1 - [B7Z254_HUMAN]	3.89	5	1	1	1	55.41	3.89	1	1	437	47.8081	5.08447
Q86V81	THO complex subunit 4 OS=Homo sapiens GN=ALYREF PE=1 SV=3 - [THOC4_HUMAN]	3.89	2	1	1	1	40.89	3.89	1	1	257	26.8716	11.1509
O00391	Sulfhydryl oxidase 1 OS=Homo sapiens GN=QSOX1 PE=1 SV=3 - [QSOX1_HUMAN]	3.88	2	2	2	3	66.2833	3.88	2	3	747	82.5255	8.92432
P07996	Thrombospondin-1 OS=Homo sapiens GN=THBS1 PE=1 SV=2 - [TSP1_HUMAN]	3.85	2	4	4	7	158.61	3.85	4	7	1170	129.3	4.94482
P23246	Splicing factor, proline- and glutamine-rich OS=Homo sapiens GN=SFPQ PE=1 SV=2 - [SFPQ_HUMAN]	3.82	1	2	2	2	83.43	3.82	2	2	707	76.1016	9.43701
F8VYK9	Insulin-like growth factor-binding protein 6 OS=Homo sapiens GN=IGFBP6 PE=2 SV=1 - [F8VYK9_HUMAN]	3.78	2	1	1	2	47.74	3.78	1	2	238	25.1361	7.81104
F8W914	Reticulon OS=Homo sapiens GN=RTN4 PE=2 SV=1 - [F8W914_HUMAN]	3.77	4	1	1	2	101.55	3.77	1	2	345	37.1214	4.76709
E9PG83	Perilipin-2 OS=Homo sapiens GN=PLIN2 PE=2 SV=1 - [E9PG83_HUMAN]	3.65	2	1	1	1	71.34	3.65	1	1	356	39.28	7.82568
Q32N00	DNA polymerase delta subunit 3 OS=Homo sapiens GN=POLD3 PE=2 SV=1 - [Q32N00_HUMAN]	3.61	3	1	1	1	49.72	3.61	1	1	360	39.296	9.43701
Q5JVE8	Factor X light chain OS=Homo sapiens GN=F10 PE=2 SV=1 - [Q5JVE8_HUMAN]	3.61	3	1	1	1	38.27	3.61	1	1	332	37.0706	5.8208
P40121-2	Isoform 2 of Macrophage-capping protein OS=Homo sapiens GN=CAPG - [CAPG_HUMAN]	3.6	2	1	1	1	44.51	3.6	1	1	333	36.8337	7.1958
Q8WX77	Insulin-like growth factor-binding protein-like 1 OS=Homo sapiens GN=IGFBPL1 PE=2 SV=1 - [IBPL1_HUMAN]	3.6	1	1	1	1	32.39	3.6	1	1	278	28.9866	7.92822
P34931	Heat shock 70 kDa protein 1-like OS=Homo sapiens GN=HSPA1L PE=1 SV=2 - [HS71L_HUMAN]	3.59	6	1	2	5	152.39	3.59	2	5	641	70.3313	6.02393
Q9H3N1	Thioredoxin-related transmembrane protein 1 OS=Homo sapiens GN=TMX1 PE=1 SV=1 - [TMX1_HUMAN]	3.57	1	1	1	1	42.44	3.57	1	1	280	31.7708	4.98291
H0Y715	Voltage-dependent calcium channel subunit alpha-2-1 (Fragment) OS=Homo sapiens GN=CACNA2D1 PE=4 SV=1 - [H0Y715_HUMAN]	3.57	6	1	1	1	38.58	3.57	1	1	280	32.4953	5.46533
P37837	Transaldolase OS=Homo sapiens GN=TALDO1 PE=1 SV=2 - [TALDO_HUMAN]	3.56	1	1	1	1	0	3.56	1	1	337	37.5165	6.81494
E9PMD7	Serine/threonine-protein phosphatase (Fragment) OS=Homo sapiens GN=PPP1CA PE=2 SV=1 - [E9PMD7_HUMAN]	3.56	4	1	1	1	55.83	3.56	1	1	253	28.8793	4.86865
P07602	Proactivator polypeptide OS=Homo sapiens GN=PSAP PE=1 SV=2 - [SAP_HUMAN]	3.44	5	2	2	5	48.6269	3.44	2	5	524	58.0739	5.17334
Q14814-6	Isoform MEF2D00 of Myocyte-specific enhancer factor 2D OS=Homo sapiens GN=MEF2D - [MEF2D_HUMAN]	3.42	7	1	1	2	117.82	3.42	1	2	468	49.8255	9.23193
B7Z8T3	Fetuin-B OS=Homo sapiens GN=FETUB PE=2 SV=1 - [B7Z8T3_HUMAN]	3.42	4	1	1	1	32.44	3.42	1	1	234	25.4534	5.05908
Q15717	ELAV-like protein 1 OS=Homo sapiens GN=ELAVL1 PE=1 SV=2 - [ELAV1_HUMAN]	3.37	2	1	1	1	56.6	3.37	1	1	326	36.0692	9.17334
Q5TBF5	Mimecan (Fragment) OS=Homo sapiens GN=OGN PE=2 SV=1 - [Q5TBF5_HUMAN]	3.36	2	1	1	2	29.05	3.36	1	2	268	30.4373	8.33838
P46013	Antigen KI-67 OS=Homo sapiens GN=MKI67 PE=1 SV=2 - [KI67_HUMAN]	3.35	2	5	5	5	164.425	3.35	5	5	3256	358.474	9.45166
P08294	Extracellular superoxide dismutase [Cu-Zn] OS=Homo sapiens GN=SOD3 PE=1 SV=2 - [SODE_HUMAN]	3.33	1	1	1	1	27.9	3.33	1	1	240	25.8347	6.60986
E9PJT3	Splicing factor 3B subunit 2 (Fragment) OS=Homo sapiens GN=SF3B2 PE=2 SV=1 - [E9PJT3_HUMAN]	3.3	4	1	1	1	51.25	3.3	1	1	273	29.1163	5.65576
O75533	Splicing factor 3B subunit 1 OS=Homo sapiens GN=SF3B1 PE=1 SV=3 - [SF3B1_HUMAN]	3.3	1	3	3	3	117.99	3.3	3	3	1304	145.738	7.09326
Q9Y224	UPF0568 protein C14orf166 OS=Homo sapiens GN=C14orf166 PE=1 SV=1 - [CN166_HUMAN]	3.28	1	1	1	1	17.84	3.28	1	1	244	28.0507	6.65381
B4DXI2	Bromodomain-containing protein 9 OS=Homo sapiens GN=BRD9 PE=2 SV=1 - [B4DXI2_HUMAN]	3.27	7	1	1	2	24.32	3.27	1	2	214	24.3663	8.23584
F8W9A9	NF-kappa-B essential modulator OS=Homo sapiens GN=IKBKG PE=2 SV=1 - [F8W9A9_HUMAN]	3.26	6	1	1	1	0	3.26	1	1	368	42.3945	5.79541
P29353-5	Isoform 5 of SHC-transforming protein 1 OS=Homo sapiens GN=SHC1 - [SHC1_HUMAN]	3.25	7	1	1	1	28.62	3.25	1	1	369	40.3891	5.99854
S4R3H4	Apoptotic chromatin condensation inducer in the nucleus OS=Homo sapiens GN=ACIN1 PE=4 SV=1 - [S4R3H4_HUMAN]	3.2	8	3	3	4	94.0527	3.2	3	4	1283	145.355	5.99854
D6RAM3	Docking protein 3 OS=Homo sapiens GN=DOK3 PE=2 SV=1 - [D6RAM3_HUMAN]	3.18	2	1	1	1	24.66	3.18	1	1	440	47.572	7.60596
P08311	Cathepsin G OS=Homo sapiens GN=CTSG PE=1 SV=2 - [CATG_HUMAN]	3.14	1	1	1	1	33.64	3.14	1	1	255	28.8191	11.1948
B4DLV2	DNA topoisomerase 2-beta OS=Homo sapiens GN=TOP2B PE=2 SV=1 - [B4DLV2_HUMAN]	3.14	3	1	1	1	49.28	3.14	1	1	478	52.9868	5.66846
Q8N9G1	Protein transport protein Sec16A OS=Homo sapiens GN=SEC16A PE=2 SV=1 - [Q8N9G1_HUMAN]	3.12	7	1	1	1	66.82	3.12	1	1	385	40.7898	7.63525
Q92841-1	Isoform 2 of Probable ATP-dependent RNA helicase DDX17 OS=Homo sapiens GN=DDX17 - [DDX17_HUMAN]	3.08	6	2	2	2	41.5	3.08	2	2	650	72.326	8.5874
F6UYG0	Serine/threonine-protein kinase WNK1 OS=Homo sapiens GN=WNK1 PE=2 SV=1 - [F6UYG0_HUMAN]	3.05	7	1	1	1	57.66	3.05	1	1	393	42.4078	9.14404
H7BZT7	S-formylglutathione hydrolase (Fragment) OS=Homo sapiens GN=ESD PE=4 SV=1 - [H7BZT7_HUMAN]	3.04	2	1	1	1	51.01	3.04	1	1	230	25.4626	6.85889
G3V3R6	Galectin-3 OS=Homo sapiens GN=LGALS3 PE=2 SV=1 - [G3V3R6_HUMAN]	3	2	1	1	1	36.12	3	1	1	233	24.0709	9.39307
Q5TCU6	Talin-1 OS=Homo sapiens GN=TLN1 PE=2 SV=1 - [Q5TCU6_HUMAN]	2.96	2	5	5	7	215.841	2.96	5	7	2429	257.92	6.49365
H0YDB2	Stromal interaction molecule 1 (Fragment) OS=Homo sapiens GN=STIM1 PE=4 SV=1 - [H0YDB2_HUMAN]	2.96	4	1	1	1	50.78	2.96	1	1	405	45.3459	6.84424
M0R2I2	BRISC and BRCA1-A complex member 1 (Fragment) OS=Homo sapiens GN=BABAM1 PE=4 SV=1 - [M0R2I2_HUMAN]	2.95	1	1	1	1	43.8	2.95	1	1	237	25.7096	4.71631
Q8TD55-2	Isoform 2 of Pleckstrin homology domain-containing family O member 2 OS=Homo sapiens GN=PLEKHO2 - [PKHO2_HUMAN]	2.95	2	1	1	1	46	2.95	1	1	440	47.7562	5.2749
H7C5H1	Complement factor B (Fragment) OS=Homo sapiens GN=CFB PE=3 SV=1 - [H7C5H1_HUMAN]	2.95	4	1	1	1	34.84	2.95	1	1	305	34.6699	7.06396
O75909	Cyclin-K OS=Homo sapiens GN=CCNK PE=1 SV=2 - [CCNK_HUMAN]	2.93	2	1	1	1	44.48	2.93	1	1	580	64.1987	8.41162
Q9UN86-2	Isoform B of Ras GTPase-activating protein-binding protein 2 OS=Homo sapiens GN=G3BP2 - [G3BP2_HUMAN]	2.9	2	1	1	1	58.11	2.9	1	1	449	50.7861	5.37646
Q68EM7-7	Isoform 7 of Rho GTPase-activating protein 17 OS=Homo sapiens GN=ARHGAP17 - [RHG17_HUMAN]	2.9	6	1	1	1	51.41	2.9	1	1	414	42.4861	9.37842
Q9Y3Z3-3	Isoform 3 of Deoxynucleoside triphosphate triphosphohydrolase SAMHD1 OS=Homo sapiens GN=SAMHD1 - [SAMH1_HUMAN]	2.88	4	1	1	1	63.38	2.88	1	1	556	63.6355	6.771
P13010	X-ray repair cross-complementing protein 5 OS=Homo sapiens GN=XRCC5 PE=1 SV=3 - [XRCC5_HUMAN]	2.87	1	2	2	4	45.88	2.87	2	4	732	82.6523	5.80811
P07948-2	Isoform 2 of Tyrosine-protein kinase Lyn OS=Homo sapiens GN=LYN - [LYN_HUMAN]	2.85	1	1	1	1	25.69	2.85	1	1	491	55.9975	6.49365
P49756	RNA-binding protein 25 OS=Homo sapiens GN=RBM25 PE=1 SV=3 - [RBM25_HUMAN]	2.85	1	2	2	2	41.93	2.85	2	2	843	100.124	6.31592
P07814	Bifunctional glutamate/proline--tRNA ligase OS=Homo sapiens GN=EPRS PE=1 SV=5 - [SYEP_HUMAN]	2.84	1	3	3	5	165	2.84	3	5	1512	170.483	7.32764
O15372	Eukaryotic translation initiation factor 3 subunit H OS=Homo sapiens GN=EIF3H PE=1 SV=1 - [EIF3H_HUMAN]	2.84	2	1	1	2	45.91	2.84	1	2	352	39.9051	6.53662
P00740-2	Isoform 2 of Coagulation factor IX OS=Homo sapiens GN=F9 - [FA9_HUMAN]	2.84	2	1	1	2	51.87	2.84	1	2	423	47.5874	6.11279
Q96KP4-2	Isoform 2 of Cytosolic non-specific dipeptidase OS=Homo sapiens GN=CNDP2 - [CNDP2_HUMAN]	2.81	2	1	1	1	40.35	2.81	1	1	391	43.8053	6.48096
O15427	Monocarboxylate transporter 4 OS=Homo sapiens GN=SLC16A3 PE=1 SV=1 - [MOT4_HUMAN]	2.8	1	1	1	1	88.3	2.8	1	1	465	49.4369	7.95752
E9PAU2	Ribonucleoprotein PTB-binding 1 OS=Homo sapiens GN=RAVER1 PE=2 SV=1 - [E9PAU2_HUMAN]	2.78	1	1	1	2	61.13	2.78	1	2	756	79.5292	8.92432
Q8IYB3-2	Isoform 2 of Serine/arginine repetitive matrix protein 1 OS=Homo sapiens GN=SRRM1 - [SRRM1_HUMAN]	2.77	4	1	1	2	36.05	2.77	1	2	902	102.065	11.8101
P22314	Ubiquitin-like modifier-activating enzyme 1 OS=Homo sapiens GN=UBA1 PE=1 SV=3 - [UBA1_HUMAN]	2.74	2	2	2	2	81.45	2.74	2	2	1058	117.774	5.75732
P02788-2	Isoform DeltaLf of Lactotransferrin OS=Homo sapiens GN=LTF - [TRFL_HUMAN]	2.7	4	2	2	4	98.66	2.7	2	4	666	73.1142	7.85498
P17050	Alpha-N-acetylgalactosaminidase OS=Homo sapiens GN=NAGA PE=1 SV=2 - [NAGAB_HUMAN]	2.68	1	1	1	1	21	2.68	1	1	411	46.5339	5.18604
E9PBS1	Phosphoribosylaminoimidazole carboxylase (Fragment) OS=Homo sapiens GN=PAICS PE=2 SV=1 - [E9PBS1_HUMAN]	2.66	3	1	1	2	42.37	2.66	1	2	413	45.6224	6.68311
P22681	E3 ubiquitin-protein ligase CBL OS=Homo sapiens GN=CBL PE=1 SV=2 - [CBL_HUMAN]	2.65	1	2	2	2	42.45	2.65	2	2	906	99.5693	6.53662
Q4KMP7	TBC1 domain family member 10B OS=Homo sapiens GN=TBC1D10B PE=1 SV=3 - [TB10B_HUMAN]	2.6	1	1	1	1	40.17	2.6	1	1	808	87.1447	9.18799
Q5JU67-2	Isoform 2 of Uncharacterized protein C9orf117 OS=Homo sapiens GN=C9orf117 - [CI117_HUMAN]	2.59	2	1	1	1	0	2.59	1	1	425	49.8373	9.0708
P42768	Wiskott-Aldrich syndrome protein OS=Homo sapiens GN=WAS PE=1 SV=4 - [WASP_HUMAN]	2.59	1	1	1	2	65.28	2.59	1	2	502	52.8799	6.63916
J3KNQ3	26S proteasome non-ATPase regulatory subunit 13 OS=Homo sapiens GN=PSMD13 PE=2 SV=1 - [J3KNQ3_HUMAN]	2.58	3	1	1	1	16.69	2.58	1	1	349	39.8045	5.56689
E9PBF6	Lamin-B1 OS=Homo sapiens GN=LMNB1 PE=2 SV=1 - [E9PBF6_HUMAN]	2.58	2	1	1	1	45.4	2.58	1	1	387	44.6157	5.04639
Q9Y3L3	SH3 domain-binding protein 1 OS=Homo sapiens GN=SH3BP1 PE=1 SV=3 - [3BP1_HUMAN]	2.57	1	1	1	2	24.35	2.57	1	2	701	75.6658	6.771
B7Z9C4	CTP synthase 1 OS=Homo sapiens GN=CTPS1 PE=2 SV=1 - [B7Z9C4_HUMAN]	2.55	3	1	1	1	30.95	2.55	1	1	314	35.2312	5.90967
J3KNT0	Fascin OS=Homo sapiens GN=FSCN1 PE=2 SV=1 - [J3KNT0_HUMAN]	2.54	2	1	1	1	41.67	2.54	1	1	472	52.2299	7.44482
Q9BSJ8	Extended synaptotagmin-1 OS=Homo sapiens GN=ESYT1 PE=1 SV=1 - [ESYT1_HUMAN]	2.54	2	2	2	3	129.585	2.54	2	3	1104	122.78	5.8335
C9J3F6	TBC1 domain family member 5 OS=Homo sapiens GN=TBC1D5 PE=2 SV=1 - [C9J3F6_HUMAN]	2.53	3	1	1	2	91.18	2.53	1	2	593	67.4914	7.79639
A8MYE6	Integrin beta OS=Homo sapiens GN=ITGB2 PE=2 SV=1 - [A8MYE6_HUMAN]	2.53	3	2	2	2	69.11	2.53	2	2	712	78.2938	6.84424
E7EN32	Menin OS=Homo sapiens GN=MEN1 PE=2 SV=1 - [E7EN32_HUMAN]	2.52	4	1	1	1	0	2.52	1	1	555	61.3807	6.87354
P32519-2	Isoform 2 of ETS-related transcription factor Elf-1 OS=Homo sapiens GN=ELF1 - [ELF1_HUMAN]	2.52	2	1	1	1	41.58	2.52	1	1	595	64.8889	5.35107
Q96ST3	Paired amphipathic helix protein Sin3a OS=Homo sapiens GN=SIN3A PE=1 SV=2 - [SIN3A_HUMAN]	2.51	1	2	2	2	21.6	2.51	2	2	1273	145.085	7.25439
C9JGI3	Thymidine phosphorylase (Fragment) OS=Homo sapiens GN=TYMP PE=2 SV=1 - [C9JGI3_HUMAN]	2.47	3	1	1	1	22.1	2.47	1	1	445	46.0582	5.51611
E5RIM3	Phospholipase A-2-activating protein OS=Homo sapiens GN=PLAA PE=2 SV=1 - [E5RIM3_HUMAN]	2.46	2	1	1	1	51.01	2.46	1	1	609	66.6917	5.97314
Q15029-2	Isoform 2 of 116 kDa U5 small nuclear ribonucleoprotein component OS=Homo sapiens GN=EFTUD2 - [U5S1_HUMAN]	2.45	3	1	2	2	24.7	2.45	2	2	937	105.317	5.22412
H0YLH9	Pro-interleukin-16 (Fragment) OS=Homo sapiens GN=IL16 PE=4 SV=2 - [H0YLH9_HUMAN]	2.45	5	1	1	1	61.61	2.45	1	1	611	64.6185	6.59521
B4DGC9	Dynamin-1-like protein OS=Homo sapiens GN=DNM1L PE=2 SV=1 - [B4DGC9_HUMAN]	2.44	9	1	1	1	63.95	2.44	1	1	533	59.9714	8.80713
M0QY97	Zinc finger CCCH domain-containing protein 4 (Fragment) OS=Homo sapiens GN=ZC3H4 PE=4 SV=1 - [M0QY97_HUMAN]	2.42	2	1	1	1	50.89	2.42	1	1	910	95.4765	7.32764
E7EUU6	Latent-transforming growth factor beta-binding protein 1 OS=Homo sapiens GN=LTBP1 PE=2 SV=2 - [E7EUU6_HUMAN]	2.42	8	1	1	1	67.51	2.42	1	1	619	68.7074	4.4624
E7ER27	Peroxisomal multifunctional enzyme type 2 OS=Homo sapiens GN=HSD17B4 PE=2 SV=3 - [E7ER27_HUMAN]	2.4	5	1	1	1	54.84	2.4	1	1	500	53.8945	6.32861
Q0VD83-2	Isoform 2 of Apolipoprotein B receptor OS=Homo sapiens GN=APOBR - [APOBR_HUMAN]	2.4	4	1	1	1	34.83	2.4	1	1	626	66.2953	4.41162
Q8WWM7-6	Isoform 6 of Ataxin-2-like protein OS=Homo sapiens GN=ATXN2L - [ATX2L_HUMAN]	2.38	8	1	1	9	57.935	2.38	1	9	968	102.831	8.63135
P09960-3	Isoform 3 of Leukotriene A-4 hydrolase OS=Homo sapiens GN=LTA4H - [LKHA4_HUMAN]	2.36	4	1	1	1	43.8	2.36	1	1	508	57.2633	6.06201
Q96KC8	DnaJ homolog subfamily C member 1 OS=Homo sapiens GN=DNAJC1 PE=1 SV=1 - [DNJC1_HUMAN]	2.35	1	1	1	1	54.7	2.35	1	1	554	63.8433	8.63135
Q14118	Dystroglycan OS=Homo sapiens GN=DAG1 PE=1 SV=2 - [DAG1_HUMAN]	2.35	1	2	2	3	82.31	2.35	2	3	895	97.3807	8.55811
Q14566	DNA replication licensing factor MCM6 OS=Homo sapiens GN=MCM6 PE=1 SV=1 - [MCM6_HUMAN]	2.31	1	1	1	1	60.64	2.31	1	1	821	92.8312	5.41455
Q8WU79-3	Isoform 3 of Stromal membrane-associated protein 2 OS=Homo sapiens GN=SMAP2 - [SMAP2_HUMAN]	2.29	3	1	1	1	42.84	2.29	1	1	349	37.6722	9.11475
G3V1Q8	Serine/threonine-protein kinase TAO3 OS=Homo sapiens GN=TAOK3 PE=4 SV=1 - [G3V1Q8_HUMAN]	2.28	2	1	1	1	15.93	2.28	1	1	438	53.0707	9.18799
C9JMN2	Collagen alpha-1(XI) chain (Fragment) OS=Homo sapiens GN=COL11A1 PE=2 SV=1 - [C9JMN2_HUMAN]	2.28	5	1	1	1	22.74	2.28	1	1	570	61.9289	5.78271
H0YES2	DEP domain-containing protein 1A (Fragment) OS=Homo sapiens GN=DEPDC1 PE=4 SV=1 - [H0YES2_HUMAN]	2.27	1	1	1	4	0	2.27	1	4	308	35.8663	7.18115
G3XAM2	Complement factor I light chain OS=Homo sapiens GN=CFI PE=3 SV=1 - [G3XAM2_HUMAN]	2.26	3	1	1	2	48.84	2.26	1	2	576	65.0163	7.50342
Q8NBJ5	Procollagen galactosyltransferase 1 OS=Homo sapiens GN=COLGALT1 PE=1 SV=1 - [GT251_HUMAN]	2.25	1	1	1	1	27.2	2.25	1	1	622	71.5905	7.31299
P01023	Alpha-2-macroglobulin OS=Homo sapiens GN=A2M PE=1 SV=3 - [A2MG_HUMAN]	2.24	4	3	3	29	627.231	2.24	4	29	1474	163.188	6.45557
B4DY72	Heat shock protein 105 kDa OS=Homo sapiens GN=HSPH1 PE=2 SV=1 - [B4DY72_HUMAN]	2.22	5	1	1	1	43.03	2.22	1	1	677	77.1136	5.09717
B4E161	Nucleosome assembly protein 1-like 2 OS=Homo sapiens GN=NAP1L2 PE=2 SV=1 - [B4E161_HUMAN]	2.2	1	1	1	1	0	2.2	1	1	318	37.2888	4.4751
Q32MZ4-4	Isoform 4 of Leucine-rich repeat flightless-interacting protein 1 OS=Homo sapiens GN=LRRFIP1 - [LRRF1_HUMAN]	2.19	4	1	1	1	41.89	2.19	1	1	640	73.0159	5.94775
M0R3F1	Heterogeneous nuclear ribonucleoprotein U-like protein 1 (Fragment) OS=Homo sapiens GN=HNRNPUL1 PE=4 SV=1 - [M0R3F1_HUMAN]	2.18	1	1	1	1	35.71	2.18	1	1	641	71.677	8.98291
Q14242	P-selectin glycoprotein ligand 1 OS=Homo sapiens GN=SELPLG PE=1 SV=1 - [SELPL_HUMAN]	2.18	2	1	1	1	44.77	2.18	1	1	412	43.1744	4.39893
P02748	Complement component C9 OS=Homo sapiens GN=C9 PE=1 SV=2 - [CO9_HUMAN]	2.15	1	1	1	1	51.97	2.15	1	1	559	63.1327	5.59229
D6RF86	Cadherin-6 OS=Homo sapiens GN=CDH6 PE=2 SV=1 - [D6RF86_HUMAN]	2.14	3	1	1	1	20.56	2.14	1	1	608	67.3607	4.88135
P02461	Collagen alpha-1(III) chain OS=Homo sapiens GN=COL3A1 PE=1 SV=4 - [CO3A1_HUMAN]	2.11	3	2	2	4	98.12	2.11	3	4	1466	138.479	6.60986
O94906-2	Isoform 2 of Pre-mRNA-processing factor 6 OS=Homo sapiens GN=PRPF6 - [PRP6_HUMAN]	2.11	2	1	1	1	0	2.11	1	1	901	102.364	8.26514
Q15459	Splicing factor 3A subunit 1 OS=Homo sapiens GN=SF3A1 PE=1 SV=1 - [SF3A1_HUMAN]	2.02	1	1	1	2	41.29	2.02	1	2	793	88.8305	5.22412
P10643	Complement component C7 OS=Homo sapiens GN=C7 PE=1 SV=2 - [CO7_HUMAN]	2.02	1	2	2	2	22.21	2.02	2	2	843	93.4573	6.48096
Q00610-2	Isoform 2 of Clathrin heavy chain 1 OS=Homo sapiens GN=CLTC - [CLH1_HUMAN]	2.01	5	2	2	4	63.4367	2.01	2	4	1639	187.771	5.69385
Q16600	Zinc finger protein 239 OS=Homo sapiens GN=ZNF239 PE=2 SV=3 - [ZN239_HUMAN]	1.97	1	1	1	1	38.28	1.97	1	1	458	51.5575	7.63525
B4DH53	MAP1S light chain OS=Homo sapiens GN=MAP1S PE=2 SV=1 - [B4DH53_HUMAN]	1.94	2	1	1	1	76.97	1.94	1	1	1033	109.72	7.6499
Q8NEM2	SHC SH2 domain-binding protein 1 OS=Homo sapiens GN=SHCBP1 PE=1 SV=3 - [SHCBP_HUMAN]	1.93	1	1	1	1	33.63	1.93	1	1	672	75.6422	4.75439
P53396	ATP-citrate synthase OS=Homo sapiens GN=ACLY PE=1 SV=3 - [ACLY_HUMAN]	1.91	2	2	2	5	151.137	1.91	2	5	1101	120.762	7.32764
Q96J17	NOLC1 protein OS=Homo sapiens GN=NOLC1 PE=2 SV=1 - [Q96J17_HUMAN]	1.91	4	1	1	1	43.43	1.91	1	1	418	44.1546	9.59814
Q12860-2	Isoform 2 of Contactin-1 OS=Homo sapiens GN=CNTN1 - [CNTN1_HUMAN]	1.89	3	2	2	2	76.61	1.89	2	2	1007	111.796	5.77002
Q6UX71	Plexin domain-containing protein 2 OS=Homo sapiens GN=PLXDC2 PE=1 SV=1 - [PXDC2_HUMAN]	1.89	1	1	1	2	85.43	1.89	1	2	529	59.5455	6.45557
B4DFA2	Vesicle-fusing ATPase OS=Homo sapiens GN=NSF PE=2 SV=1 - [B4DFA2_HUMAN]	1.86	3	1	1	1	50.86	1.86	1	1	644	71.5386	6.65381
F8W720	GMP synthase [glutamine-hydrolyzing] OS=Homo sapiens GN=GMPS PE=2 SV=1 - [F8W720_HUMAN]	1.85	2	1	1	1	38.8	1.85	1	1	594	65.8875	7.47412
F5H6Y1	Phenylalanine--tRNA ligase beta subunit OS=Homo sapiens GN=FARSB PE=2 SV=1 - [F5H6Y1_HUMAN]	1.84	2	1	1	1	29.54	1.84	1	1	490	54.8257	7.50342
Q29RF7	Sister chromatid cohesion protein PDS5 homolog A OS=Homo sapiens GN=PDS5A PE=1 SV=1 - [PDS5A_HUMAN]	1.8	1	2	2	3	194.807	1.8	2	3	1337	150.734	7.91357
K4DI84	PML-RARA regulated adaptor molecule 1, isoform CRA_b OS=Homo sapiens GN=PRAM1 PE=2 SV=1 - [K4DI84_HUMAN]	1.79	3	1	1	1	51.98	1.79	1	1	669	73.7949	9.67139
Q9UN70-4	Isoform 4 of Protocadherin gamma-C3 OS=Homo sapiens GN=PCDHGC3 - [PCDGK_HUMAN]	1.76	4	1	1	1	40.89	1.76	1	1	683	73.9086	4.69092
Q14258	E3 ubiquitin/ISG15 ligase TRIM25 OS=Homo sapiens GN=TRIM25 PE=1 SV=2 - [TRI25_HUMAN]	1.75	1	1	1	1	26.66	1.75	1	1	630	70.9277	8.08936
Q9P2F6-4	Isoform 4 of Rho GTPase-activating protein 20 OS=Homo sapiens GN=ARHGAP20 - [RHG20_HUMAN]	1.73	4	1	1	1	14.86	1.73	1	1	1155	128.879	7.79639
Q5HY54	Filamin-A OS=Homo sapiens GN=FLNA PE=2 SV=1 - [Q5HY54_HUMAN]	1.69	4	3	3	5	136.94	1.69	4	5	2607	276.378	6.04932
S4R418	Bridging integrator 2 OS=Homo sapiens GN=BIN2 PE=4 SV=1 - [S4R418_HUMAN]	1.69	4	1	1	1	36.93	1.69	1	1	531	58.5086	6.43018
P28300	Protein-lysine 6-oxidase OS=Homo sapiens GN=LOX PE=1 SV=2 - [LYOX_HUMAN]	1.68	1	1	1	1	30.82	1.68	1	1	417	46.9145	8.08936
Q04756	Hepatocyte growth factor activator OS=Homo sapiens GN=HGFAC PE=1 SV=1 - [HGFA_HUMAN]	1.68	2	1	1	1	72.2	1.68	1	1	655	70.6361	7.23975
H0YCW2	Zinc finger SWIM domain-containing protein 8 (Fragment) OS=Homo sapiens GN=ZSWIM8 PE=2 SV=1 - [H0YCW2_HUMAN]	1.66	10	1	1	1	14.36	1.66	1	1	904	95.9858	7.07861
P17480-2	Isoform UBF2 of Nucleolar transcription factor 1 OS=Homo sapiens GN=UBTF - [UBF1_HUMAN]	1.65	3	1	1	1	19.5	1.65	1	1	727	84.8838	5.5542
P08240-2	Isoform 2 of Signal recognition particle receptor subunit alpha OS=Homo sapiens GN=SRPR - [SRPR_HUMAN]	1.64	2	1	1	1	27.1	1.64	1	1	610	66.5166	9.0415
P46940	Ras GTPase-activating-like protein IQGAP1 OS=Homo sapiens GN=IQGAP1 PE=1 SV=1 - [IQGA1_HUMAN]	1.63	2	3	3	5	117.689	1.63	3	5	1657	189.134	6.48096
Q9NP74	Palmdelphin OS=Homo sapiens GN=PALMD PE=1 SV=1 - [PALMD_HUMAN]	1.63	2	1	1	1	0	1.63	1	1	551	62.7197	5.43994
Q96RQ9	L-amino-acid oxidase OS=Homo sapiens GN=IL4I1 PE=1 SV=1 - [OXLA_HUMAN]	1.59	2	1	1	1	18.74	1.59	1	1	567	62.8417	8.67529
P78347-2	Isoform 2 of General transcription factor II-I OS=Homo sapiens GN=GTF2I - [GTF2I_HUMAN]	1.57	4	1	1	1	29.88	1.57	1	1	957	107.902	7.94287
Q9Y5K6	CD2-associated protein OS=Homo sapiens GN=CD2AP PE=1 SV=1 - [CD2AP_HUMAN]	1.56	1	1	1	1	31.15	1.56	1	1	639	71.4073	6.40479
P49591	Serine--tRNA ligase, cytoplasmic OS=Homo sapiens GN=SARS PE=1 SV=3 - [SYSC_HUMAN]	1.56	2	1	1	1	39.54	1.56	1	1	514	58.7401	6.43018
A6NGJ6	Tripartite motif-containing protein 64 OS=Homo sapiens GN=TRIM64 PE=2 SV=4 - [TRI64_HUMAN]	1.56	2	1	1	1	0	1.56	1	1	449	51.5328	5.14795
B4E1H2	Plasma protease C1 inhibitor OS=Homo sapiens GN=SERPING1 PE=2 SV=1 - [B4E1H2_HUMAN]	1.56	5	1	1	1	30.46	1.56	1	1	448	49.7255	6.53662
H3BRV0	Eukaryotic translation initiation factor 3 subunit C OS=Homo sapiens GN=EIF3C PE=2 SV=1 - [H3BRV0_HUMAN]	1.55	3	1	1	1	19.89	1.55	1	1	903	104.036	5.63037
Q06481-5	Isoform 5 of Amyloid-like protein 2 OS=Homo sapiens GN=APLP2 - [APLP2_HUMAN]	1.53	7	1	1	1	0	1.53	1	1	522	59.1141	5.59229
P13671	Complement component C6 OS=Homo sapiens GN=C6 PE=1 SV=3 - [CO6_HUMAN]	1.5	1	1	1	1	63.32	1.5	1	1	934	104.718	6.75635
P02452	Collagen alpha-1(I) chain OS=Homo sapiens GN=COL1A1 PE=1 SV=5 - [CO1A1_HUMAN]	1.5	1	2	2	2	60.65	1.5	2	2	1464	138.857	5.79541
Q9Y678	Coatomer subunit gamma-1 OS=Homo sapiens GN=COPG1 PE=1 SV=1 - [COPG1_HUMAN]	1.49	1	1	1	1	53.56	1.49	1	1	874	97.6555	5.46533
Q9ULW0	Targeting protein for Xklp2 OS=Homo sapiens GN=TPX2 PE=1 SV=2 - [TPX2_HUMAN]	1.47	2	1	1	1	42.79	1.47	1	1	747	85.6	9.23193
Q08211	ATP-dependent RNA helicase A OS=Homo sapiens GN=DHX9 PE=1 SV=4 - [DHX9_HUMAN]	1.42	1	1	1	1	60.05	1.42	1	1	1270	140.869	6.84424
P11216	Glycogen phosphorylase, brain form OS=Homo sapiens GN=PYGB PE=1 SV=5 - [PYGB_HUMAN]	1.42	1	1	1	1	40.46	1.42	1	1	843	96.6345	6.85889
B4DKJ3	Cartilage oligomeric matrix protein OS=Homo sapiens GN=COMP PE=2 SV=1 - [B4DKJ3_HUMAN]	1.42	5	1	1	3	52.5514	1.42	1	3	704	77.165	4.52588
F5H335	Eukaryotic translation initiation factor 3 subunit A OS=Homo sapiens GN=EIF3A PE=2 SV=1 - [F5H335_HUMAN]	1.41	2	2	2	2	40.1	1.41	2	2	1348	162.537	6.771
Q5SR54	Calsyntenin-1 (Fragment) OS=Homo sapiens GN=CLSTN1 PE=2 SV=1 - [Q5SR54_HUMAN]	1.41	4	1	1	1	61.01	1.41	1	1	782	87.9847	4.81787
B4E2Q6	Regulation of nuclear pre-mRNA domain-containing protein 2 OS=Homo sapiens GN=RPRD2 PE=2 SV=1 - [B4E2Q6_HUMAN]	1.39	4	1	1	1	57.26	1.39	1	1	934	100.21	6.48096
O43143	Putative pre-mRNA-splicing factor ATP-dependent RNA helicase DHX15 OS=Homo sapiens GN=DHX15 PE=1 SV=2 - [DHX15_HUMAN]	1.38	1	1	1	1	21.14	1.38	1	1	795	90.8752	7.45947
H3BP52	Maltase-glucoamylase, intestinal (Fragment) OS=Homo sapiens GN=MGA PE=2 SV=1 - [H3BP52_HUMAN]	1.38	5	1	1	1	17.11	1.38	1	1	1086	120.518	8.25049
P53618	Coatomer subunit beta OS=Homo sapiens GN=COPB1 PE=1 SV=3 - [COPB_HUMAN]	1.36	1	1	1	1	17.67	1.36	1	1	953	107.074	6.04932
P46087-2	Isoform 2 of Putative ribosomal RNA methyltransferase NOP2 OS=Homo sapiens GN=NOP2 - [NOP2_HUMAN]	1.36	3	1	1	1	50.37	1.36	1	1	808	88.9189	9.23193
Q8WXK1	Ankyrin repeat and SOCS box protein 15 OS=Homo sapiens GN=ASB15 PE=2 SV=3 - [ASB15_HUMAN]	1.36	1	1	1	1	38.84	1.36	1	1	588	65.7565	5.8335
Q05682-5	Isoform 5 of Caldesmon OS=Homo sapiens GN=CALD1 - [CALD1_HUMAN]	1.32	9	1	1	1	28.13	1.32	1	1	532	61.1762	6.7124
H0Y3K4	RNA-binding protein 33 (Fragment) OS=Homo sapiens GN=RBM33 PE=4 SV=1 - [H0Y3K4_HUMAN]	1.32	2	1	1	1	21.73	1.32	1	1	909	100.293	10.8286
Q9H7N4	Splicing factor, arginine/serine-rich 19 OS=Homo sapiens GN=SCAF1 PE=1 SV=3 - [SFR19_HUMAN]	1.3	1	1	1	1	62.24	1.3	1	1	1312	139.186	9.24658
H7C3J6	Sterile alpha motif domain-containing protein 11 (Fragment) OS=Homo sapiens GN=SAMD11 PE=4 SV=1 - [H7C3J6_HUMAN]	1.29	1	1	1	1	26.17	1.29	1	1	541	57.205	6.30322
P02458-1	Isoform 1 of Collagen alpha-1(II) chain OS=Homo sapiens GN=COL2A1 - [CO2A1_HUMAN]	1.27	2	1	1	1	26.53	1.27	1	1	1418	134.307	8.55811
Q9BYX4	Interferon-induced helicase C domain-containing protein 1 OS=Homo sapiens GN=IFIH1 PE=1 SV=3 - [IFIH1_HUMAN]	1.27	1	1	1	1	39.42	1.27	1	1	1025	116.615	5.51611
Q99459	Cell division cycle 5-like protein OS=Homo sapiens GN=CDC5L PE=1 SV=2 - [CDC5L_HUMAN]	1.25	1	1	1	1	37.04	1.25	1	1	802	92.1937	8.17725
O14777	Kinetochore protein NDC80 homolog OS=Homo sapiens GN=NDC80 PE=1 SV=1 - [NDC80_HUMAN]	1.25	1	1	1	2	38.6401	1.25	1	2	642	73.8665	5.60498
P02751-12	Isoform 12 of Fibronectin OS=Homo sapiens GN=FN1 - [FINC_HUMAN]	1.25	17	2	2	4	82.24	1.25	2	4	2008	221.152	6.17627
O15111	Inhibitor of nuclear factor kappa-B kinase subunit alpha OS=Homo sapiens GN=CHUK PE=1 SV=2 - [IKKA_HUMAN]	1.21	1	1	1	1	25.96	1.21	1	1	745	84.585	6.72705
P42261-3	Isoform 3 of Glutamate receptor 1 OS=Homo sapiens GN=GRIA1 - [GRIA1_HUMAN]	1.21	7	1	1	1	16.09	1.21	1	1	826	92.1136	7.73779
Q8WXH0-4	Isoform 4 of Nesprin-2 OS=Homo sapiens GN=SYNE2 - [SYNE2_HUMAN]	1.18	6	1	1	1	0	1.18	1	1	763	87.3488	5.42725
P43652	Afamin OS=Homo sapiens GN=AFM PE=1 SV=1 - [AFAM_HUMAN]	1.17	1	1	1	4	52.3058	1.17	1	4	599	69.024	5.89697
Q7L014	Probable ATP-dependent RNA helicase DDX46 OS=Homo sapiens GN=DDX46 PE=1 SV=2 - [DDX46_HUMAN]	1.16	1	1	1	1	28.75	1.16	1	1	1031	117.29	9.29053
O94804	Serine/threonine-protein kinase 10 OS=Homo sapiens GN=STK10 PE=1 SV=1 - [STK10_HUMAN]	1.14	1	1	1	1	31	1.14	1	1	968	112.065	6.94678
P11388	DNA topoisomerase 2-alpha OS=Homo sapiens GN=TOP2A PE=1 SV=3 - [TOP2A_HUMAN]	1.11	4	1	1	3	181.517	1.11	1	3	1531	174.276	8.71924
B4DKA8	Ubiquitin carboxyl-terminal hydrolase OS=Homo sapiens GN=USP8 PE=2 SV=1 - [B4DKA8_HUMAN]	1.09	2	1	1	1	44.69	1.09	1	1	1012	115.009	8.45557
H7BY50	Melanoma inhibitory activity protein 3 (Fragment) OS=Homo sapiens GN=MIA3 PE=4 SV=1 - [H7BY50_HUMAN]	1.08	4	1	1	1	36.14	1.08	1	1	1016	114.045	4.75439
F5GZU3	Scaffold attachment factor B1 OS=Homo sapiens GN=SAFB PE=2 SV=1 - [F5GZU3_HUMAN]	1.07	6	1	1	1	42.39	1.07	1	1	747	84.647	6.66846
O14672	Disintegrin and metalloproteinase domain-containing protein 10 OS=Homo sapiens GN=ADAM10 PE=1 SV=1 - [ADA10_HUMAN]	1.07	1	1	1	1	26.12	1.07	1	1	748	84.0877	7.76709
J3KQ69	DNA replication licensing factor MCM3 OS=Homo sapiens GN=MCM3 PE=2 SV=1 - [J3KQ69_HUMAN]	1.05	3	1	1	1	58.58	1.05	1	1	762	85.5553	6.15088
F5GYU5	Thyrotropin receptor OS=Homo sapiens GN=TSHR PE=2 SV=2 - [F5GYU5_HUMAN]	1.05	2	1	1	1	0	1.05	1	1	764	86.7874	6.99072
Q9BVL4	Selenoprotein O OS=Homo sapiens GN=SELO PE=2 SV=3 - [SELO_HUMAN]	1.05	1	1	1	1	27.65	1.05	1	1	669	73.4437	5.97314
H7C1M2	Protein SON (Fragment) OS=Homo sapiens GN=SON PE=4 SV=1 - [H7C1M2_HUMAN]	1.03	10	1	1	1	41.89	1.03	1	1	1454	159.92	9.12939
Q9H2G4	Testis-specific Y-encoded-like protein 2 OS=Homo sapiens GN=TSPYL2 PE=1 SV=1 - [TSYL2_HUMAN]	1.01	1	1	1	3	68.0991	1.01	1	3	693	79.3868	4.57666
Q86XP3-2	Isoform 2 of ATP-dependent RNA helicase DDX42 OS=Homo sapiens GN=DDX42 - [DDX42_HUMAN]	0.98	2	1	1	1	27.17	0.98	1	1	819	90.0128	7.75244
G3V2B8	C-1-tetrahydrofolate synthase, cytoplasmic OS=Homo sapiens GN=MTHFD1 PE=2 SV=1 - [G3V2B8_HUMAN]	0.96	3	1	1	1	19.88	0.96	1	1	935	101.467	7.29834
E9PM46	Ubiquitin carboxyl-terminal hydrolase OS=Homo sapiens GN=USP47 PE=2 SV=1 - [E9PM46_HUMAN]	0.89	2	1	1	1	32.66	0.89	1	1	1355	154.6	5.05908
E7ES84	Kinetochore-associated protein 1 OS=Homo sapiens GN=KNTC1 PE=2 SV=1 - [E7ES84_HUMAN]	0.88	2	1	1	1	34.24	0.88	1	1	1134	129.135	5.80811
Q7LBC6-2	Isoform 2 of Lysine-specific demethylase 3B OS=Homo sapiens GN=KDM3B - [KDM3B_HUMAN]	0.85	2	1	1	1	22.8	0.85	1	1	1417	154.571	7.18115
Q92974-3	Isoform 3 of Rho guanine nucleotide exchange factor 2 OS=Homo sapiens GN=ARHGEF2 - [ARHG2_HUMAN]	0.84	4	1	1	1	47.63	0.84	1	1	958	108.175	6.87354
Q9C0J8	pre-mRNA 3' end processing protein WDR33 OS=Homo sapiens GN=WDR33 PE=1 SV=2 - [WDR33_HUMAN]	0.82	1	1	1	1	23.17	0.82	1	1	1336	145.799	9.17334
Q8WUM4	Programmed cell death 6-interacting protein OS=Homo sapiens GN=PDCD6IP PE=1 SV=1 - [PDC6I_HUMAN]	0.81	2	1	1	1	22.5	0.81	1	1	868	95.9631	6.52197
Q8IX12-2	Isoform 2 of Cell division cycle and apoptosis regulator protein 1 OS=Homo sapiens GN=CCAR1 - [CCAR1_HUMAN]	0.79	2	1	1	1	32.19	0.79	1	1	1135	130.962	5.75732
Q13459-2	Isoform Short of Unconventional myosin-IXb OS=Homo sapiens GN=MYO9B - [MYO9B_HUMAN]	0.79	4	1	1	1	70.85	0.79	1	1	2022	229.001	8.55811
Q15149-7	Isoform 7 of Plectin OS=Homo sapiens GN=PLEC - [PLEC_HUMAN]	0.75	9	3	3	4	76.766	0.75	3	4	4515	512.292	5.77002
O75369-5	Isoform 5 of Filamin-B OS=Homo sapiens GN=FLNB - [FLNB_HUMAN]	0.7	10	1	1	1	23.29	0.7	1	1	2146	230.145	5.5415
Q9BXW9-2	Isoform 2 of Fanconi anemia group D2 protein OS=Homo sapiens GN=FANCD2 - [FACD2_HUMAN]	0.69	2	1	1	1	0	0.69	1	1	1451	164.025	5.88428
E7ESV6	Latrophilin-3 OS=Homo sapiens GN=LPHN3 PE=2 SV=1 - [E7ESV6_HUMAN]	0.69	7	1	1	1	37.41	0.69	1	1	1299	144.968	7.53271
Q86Z14	Beta-klotho OS=Homo sapiens GN=KLB PE=1 SV=1 - [KLOTB_HUMAN]	0.67	1	1	1	7	96.1129	0.67	1	7	1044	119.732	9.21729
P01031	Complement C5 OS=Homo sapiens GN=C5 PE=1 SV=4 - [CO5_HUMAN]	0.66	1	1	1	2	69.59	0.66	1	2	1676	188.186	6.52197
Q7KZ85	Transcription elongation factor SPT6 OS=Homo sapiens GN=SUPT6H PE=1 SV=2 - [SPT6H_HUMAN]	0.58	1	1	1	23	310.697	0.58	1	23	1726	198.949	4.90674
Q8WYP5	Protein ELYS OS=Homo sapiens GN=AHCTF1 PE=1 SV=3 - [ELYS_HUMAN]	0.57	3	1	1	1	38.4	0.57	1	1	2266	252.342	6.59521
P49327	Fatty acid synthase OS=Homo sapiens GN=FASN PE=1 SV=3 - [FAS_HUMAN]	0.52	1	1	1	1	43.05	0.52	1	1	2511	273.254	6.44287
O60885	Bromodomain-containing protein 4 OS=Homo sapiens GN=BRD4 PE=1 SV=2 - [BRD4_HUMAN]	0.51	1	1	1	1	32.23	0.51	1	1	1362	152.124	9.18799
Q5T4S7-3	Isoform 3 of E3 ubiquitin-protein ligase UBR4 OS=Homo sapiens GN=UBR4 - [UBR4_HUMAN]	0.5	5	2	2	2	69.12	0.5	2	2	5159	571.489	6.03662
Q70Z35-2	Isoform 2 of Phosphatidylinositol 3,4,5-trisphosphate-dependent Rac exchanger 2 protein OS=Homo sapiens GN=PREX2 - [PREX2_HUMAN]	0.47	2	1	1	1	0	0.47	1	1	1504	171.262	7.76709
P46939	Utrophin OS=Homo sapiens GN=UTRN PE=1 SV=2 - [UTRO_HUMAN]	0.47	2	1	1	1	70.36	0.47	1	1	3433	394.22	5.32568
P12270	Nucleoprotein TPR OS=Homo sapiens GN=TPR PE=1 SV=3 - [TPR_HUMAN]	0.42	1	1	1	1	0	0.42	1	1	2363	267.131	5.021
P04114	Apolipoprotein B-100 OS=Homo sapiens GN=APOB PE=1 SV=2 - [APOB_HUMAN]	0.37	1	2	2	2	35.8	0.37	2	2	4563	515.283	7.04932
O60522-2	Isoform 2 of Tudor domain-containing protein 6 OS=Homo sapiens GN=TDRD6 - [TDRD6_HUMAN]	0.34	2	1	1	13	159.032	0.34	1	13	2066	233.054	5.2749
Q9UPN3-5	Isoform 4 of Microtubule-actin cross-linking factor 1, isoforms 1/2/3/5 OS=Homo sapiens GN=MACF1 - [MACF1_HUMAN]	0.19	4	1	1	1	0	0.19	1	1	5938	669.721	5.30029
H0Y7V4	Dynein heavy chain 8, axonemal OS=Homo sapiens GN=DNAH8 PE=2 SV=1 - [H0Y7V4_HUMAN]	0.17	3	1	1	5	49.61	0.17	1	5	4188	478.566	6.11279
O75592-2	Isoform 2 of Probable E3 ubiquitin-protein ligase MYCBP2 OS=Homo sapiens GN=MYCBP2 - [MYCB2_HUMAN]	0.15	3	1	1	1	21.3	0.15	1	1	4637	509.383	7.03467
Q96RW7-2	Isoform 2 of Hemicentin-1 OS=Homo sapiens GN=HMCN1 - [HMCN1_HUMAN]	0.13	2	1	1	3	33.961	0.13	1	3	5518	599.717	6.40479
E7ENN3	Nesprin-1 OS=Homo sapiens GN=SYNE1 PE=2 SV=1 - [E7ENN3_HUMAN]	0.12	1	1	1	1	0	0.12	1	1	8409	966.046	5.5542
